# Supplementary material for: Bioactive secondary metabolites from fungal endophytes, Penicillium oxalicum and Phoma herbarum, associated with Morus nigra and Ficus sycomorus: an in silico study
Source: Royal Society of Chemistry journal article supplement (doi:10.1039/d4ra06840h), 2024-01-01
Supplement: d4ra06840h1.pdf [file d4ra06840h1.pdf]

## Supplementary information

### **Bioactive Secondary Metabolites from Fungal Endophytes, *Penicillium oxalicum* and *Phoma herbarum*, Associated with *Morus nigra* and *Ficus sycomorus*: Supported with *In Silico* Study**

Mohamed M.M. AbdelRazek <sup>1</sup>, Ahmed M.Elissawy <sup>2,3</sup>, Nada M. Mostafa <sup>2</sup>, Ashaimaa Y. Moussa <sup>2</sup>,  
Mohamed A. Elshanawany <sup>1</sup>, Abdel Nasser B. Singab <sup>2,3\*</sup>

<sup>1</sup> Department of Pharmacognosy, Faculty of Pharmacy, Badr University in Cairo (BUC), Cairo 11829, Egypt.

<sup>2</sup> Department of Pharmacognosy, Faculty of Pharmacy, Ain-Shams University, Cairo 11566, Egypt.

<sup>3</sup> Center of Drug Discovery Research and Development, Ain Shams University, Cairo 11566, Egypt.

\* Correspondence: [vpr.nassersingab@asu.edu.eg](mailto:vpr.nassersingab@asu.edu.eg)

## Table of Contents:

|                                                                                                                                                           |    |
|-----------------------------------------------------------------------------------------------------------------------------------------------------------|----|
| Fig. S1: Macro and micromorphological features of the endophytic fungi MN14 isolate associated with <i>Morus nigra</i> .....                              | 4  |
| Fig. S2: Macro and micromorphological features of the endophytic fungi FS12 isolate associated with <i>Ficus sycomorus</i> .....                          | 4  |
| Fig. S3: Evolutionary relationships of taxa phylogenetic tree of <i>P. herbarum</i> MN14 associated with <i>Morus nigra</i> .....                         | 5  |
| Fig. S4: Evolutionary relationships of taxa phylogenetic tree of <i>P. oxalicum</i> FS12 associated with <i>Ficus sycomorus</i> .....                     | 6  |
| Table S1: DPPH and FRAP assays results for <i>P. herbarum</i> and <i>P. oxalicum</i> total extracts and their fractions. ....                             | 7  |
| Table S2: IC <sub>50</sub> values of SRB viability assay of <i>P. herbarum</i> and <i>P. oxalicum</i> total extracts and their fractions. ....            | 8  |
| Table S3: Nitric oxide inhibition for the anti-inflammatory activity of <i>P. herbarum</i> and <i>P. oxalicum</i> total extracts and their fractions..... | 9  |
| Table S4: Antimicrobial and antibiofilm screening of <i>P. herbarum</i> and <i>P. oxalicum</i> total extracts and their fractions. ....                   | 10 |
| Table S5: In vitro $\alpha$ -glucosidase inhibitory activity of <i>P. herbarum</i> and <i>P. oxalicum</i> total extracts and their fractions. ....        | 11 |
| Table S6: Identified compounds of <i>P. herbarum</i> chloroform fraction (PH2) using LC-MS. ....                                                          | 12 |
| Table S7: Identified compounds of <i>P. oxalicum</i> chloroform fraction (PO2) using LC-MS.....                                                           | 13 |
| Fig. S5: LC/MS Positive-ESI spectra of <i>P. herbarum</i> chloroform fraction (a) and <i>P. oxalicum</i> chloroform fraction (b).....                     | 14 |
| Fig. S6: <sup>1</sup> H-NMR spectrum of mevalonolactone (1).....                                                                                          | 15 |
| Fig. S7: APT NMR spectrum of mevalonolactone (1).....                                                                                                     | 15 |
| Fig. S8: H-H COSY spectrum of mevalonolactone (1).....                                                                                                    | 16 |
| Fig. S9: HMBC spectrum of mevalonolactone (1).....                                                                                                        | 16 |
| Fig. S10: <sup>1</sup> H-NMR spectrum of barcelonyl acetate (2).....                                                                                      | 17 |
| Fig. S11: APT spectrum of barcelonyl acetate (2).....                                                                                                     | 17 |
| Fig. S12: COSY spectrum of barcelonyl acetate (2).....                                                                                                    | 18 |
| Fig. S13: HSQC spectrum of barcelonyl acetate (2).....                                                                                                    | 18 |
| Fig. S14: HMBC spectrum of barcelonyl acetate (2).....                                                                                                    | 19 |
| Fig. S15: <sup>1</sup> H-NMR spectrum of glycerol monolinoleate (3).....                                                                                  | 20 |
| Fig. S16: APT spectrum of glycerol monolinoleate (3).....                                                                                                 | 20 |
| Fig. S17: HMBC spectrum of glycerol monolinoleate (3).....                                                                                                | 21 |
| Fig. S18: HSQC spectrum of glycerol monolinoleate (3).....                                                                                                | 21 |

|                                                                                  |    |
|----------------------------------------------------------------------------------|----|
| Fig. S19: H-H COSY spectrum of glycerol monolinoleate (3).....                   | 22 |
| Fig. S20: <sup>1</sup> H-NMR spectrum of 4-hydroxyphenyl acetic acid (4) .....   | 22 |
| Fig. S21: APT spectrum of 4-hydroxyphenyl acetic acid (4).....                   | 23 |
| Fig. S22: HMBC spectrum of 4-hydroxyphenyl acetic acid (4) .....                 | 23 |
| Fig. S23: HSQC spectrum of 4-hydroxyphenyl acetic acid (4) .....                 | 24 |
| Fig. S24: H-H COSY spectrum of 4-hydroxyphenyl acetic acid (4).....              | 24 |
| Fig. S25: <sup>1</sup> H-NMR spectrum of secalonic acid D (5) .....              | 25 |
| Fig. S26: APT spectrum of secalonic acid D (5) .....                             | 25 |
| Fig. S27: HSQC spectrum of secalonic acid D (5) .....                            | 26 |
| Fig. S28: HMBC spectrum of secalonic acid D (5) .....                            | 26 |
| Fig. S29: H-H COSY spectrum of secalonic acid D (5) .....                        | 27 |
| Fig. S30: <sup>1</sup> H-NMR spectrum of altersolanol A (6).....                 | 27 |
| Fig. S31: APT spectrum of altersolanol A (6).....                                | 28 |
| Fig. S32: HSQC spectrum of altersolanol A (6).....                               | 28 |
| Fig. S33: HMBC spectrum of altersolanol A (6).....                               | 29 |
| Fig. S34: H-H COSY spectrum of altersolanol A (6) .....                          | 29 |
| Fig. S35: <sup>1</sup> H-NMR spectrum of ergosterol (7) .....                    | 30 |
| Fig. S36: APT spectrum of ergosterol (7) .....                                   | 30 |
| Table S8: <i>In silico</i> 2D and 3D interaction of the isolated compounds ..... | 31 |

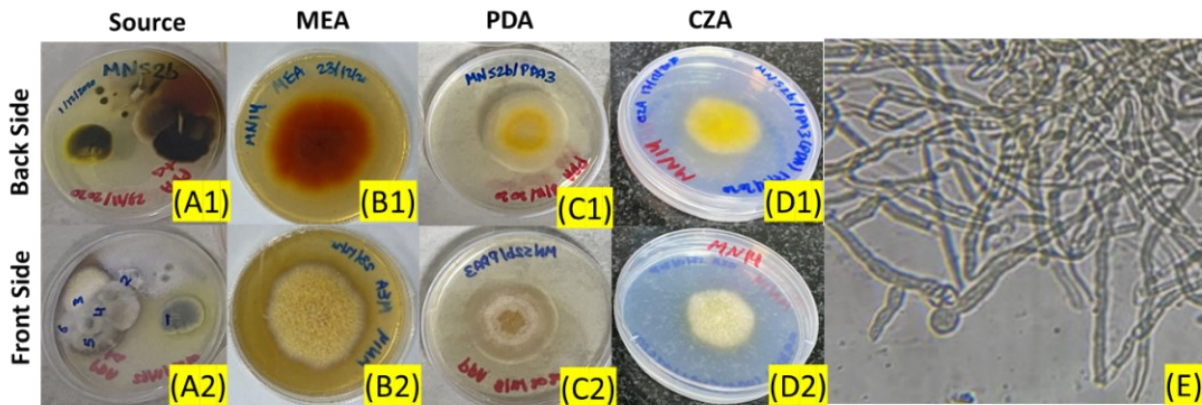

**Fig. S1: Macro and micromorphological features of the endophytic fungi MN14 isolate associated with *Morus nigra*.**

The isolated fungal strain MN14 macromorphological features as front and back side of petri dish: **(A1-A2)**: stem part inoculated in petri dish containing nutrient agar with gentamycin as a source of isolated fungal strain; **(B1-B2)**: isolated pure fungal strain on malt extract agar (MAE). **(C1-C2)**: isolated pure fungal strain MN14 on potato dextrose agar (PAD); **(D1-D2)**= isolated fungal strain MN14 on Czapek-dox agar (CZA); **(E)**: Micromorphological features using microscopic examination of the isolated fungal strain MN14 showed *Phoma* sp. microscopic features.

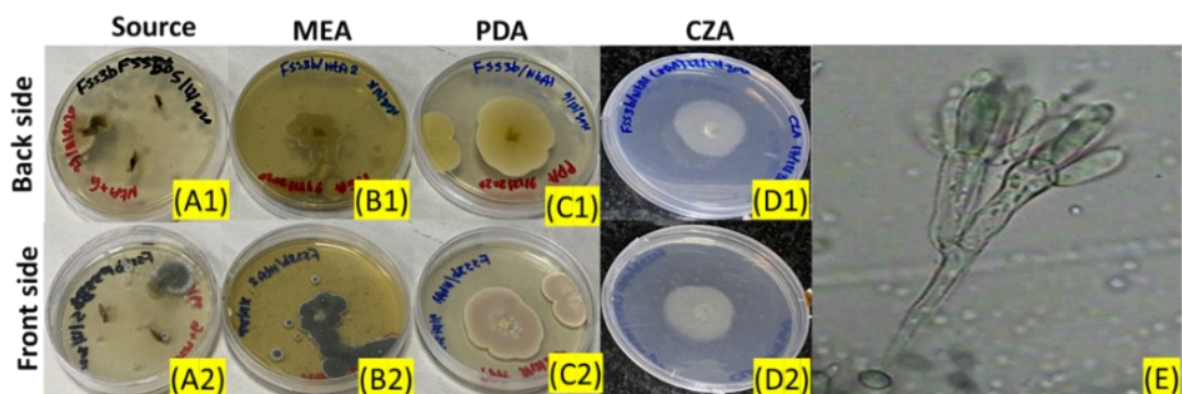

**Fig. S2: Macro and micromorphological features of the endophytic fungi FS12 isolate associated with *Ficus sycomorus*.**

The isolated fungal strain FS12 macromorphological features as front and back side of petri dish: **(A1-A2)**: stem part inoculated in petri dish containing nutrient agar with gentamycin as a source of isolated fungal strain; **(B1-B2)**: isolated pure fungal strain on malt extract agar (MAE). **(C1-C2)**: isolated pure fungal strain FS12 on potato dextrose agar (PAD); **(D1-D2)**: isolated fungal strain FS12 on Czapek-dox agar (CZA); **(E)**: Micromorphological features using microscopic examination of the isolated fungal strain FS12 showed *Penicillium* sp. hyphae and spores in *Penicillium* type conidia.

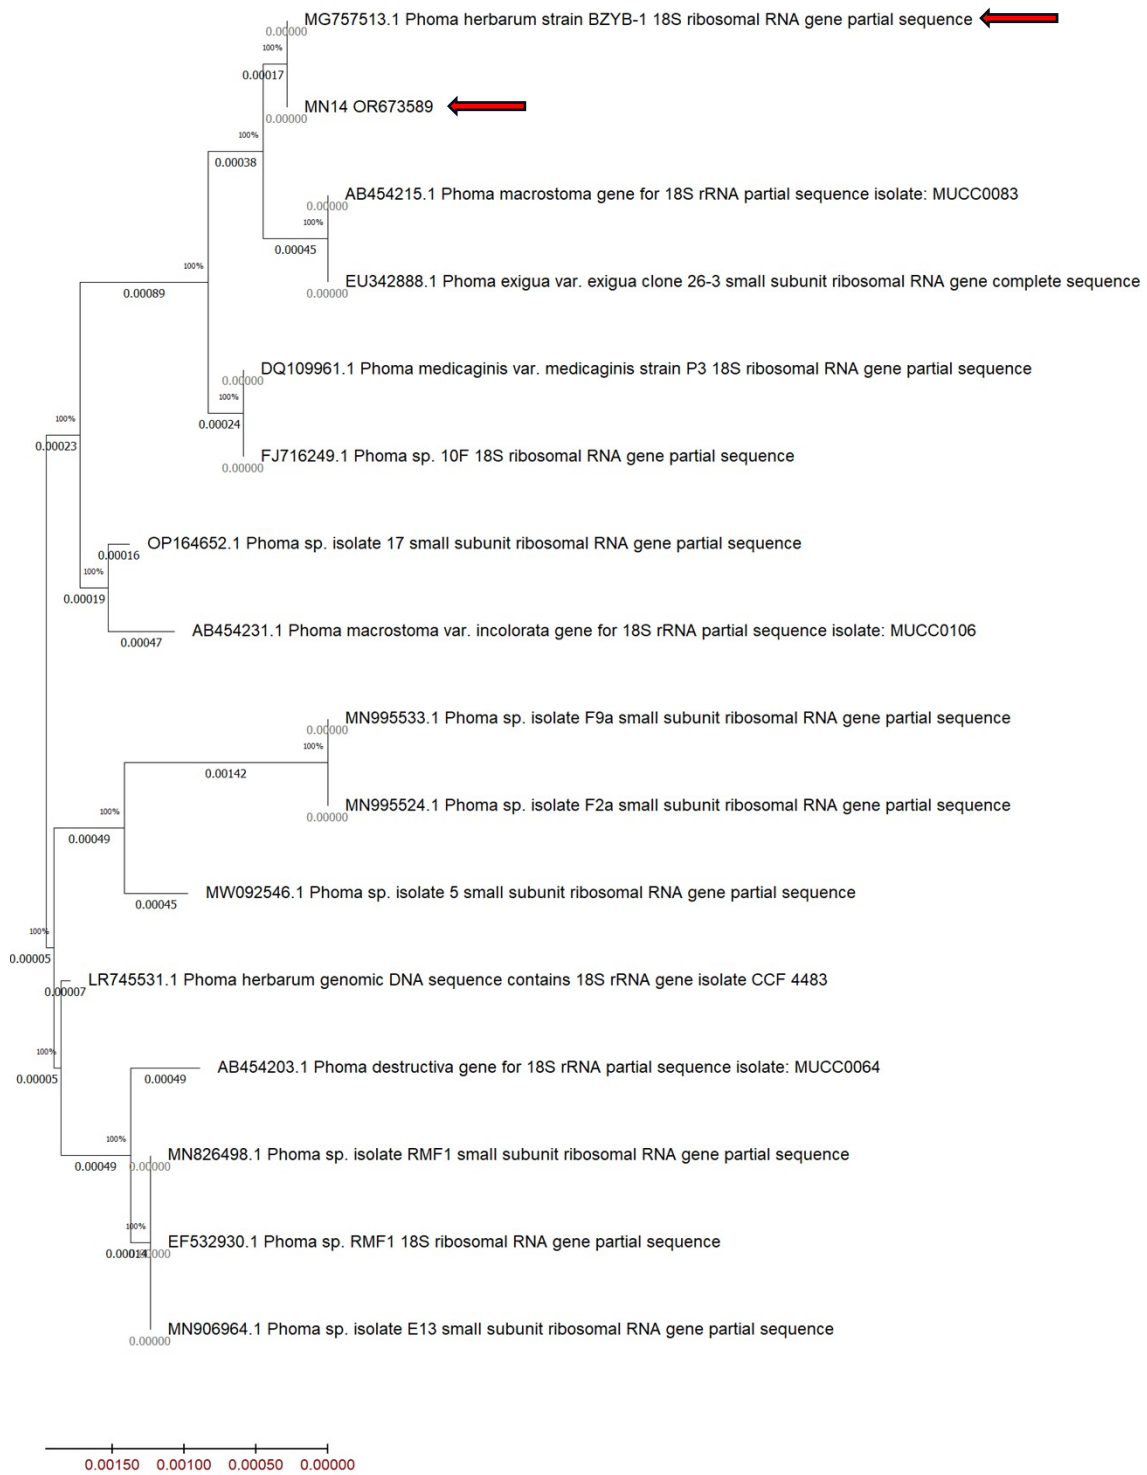

**Fig. S3: Evolutionary relationships of taxa phylogenetic tree of *P. herbarum* MN14 associated with *Morus nigra***

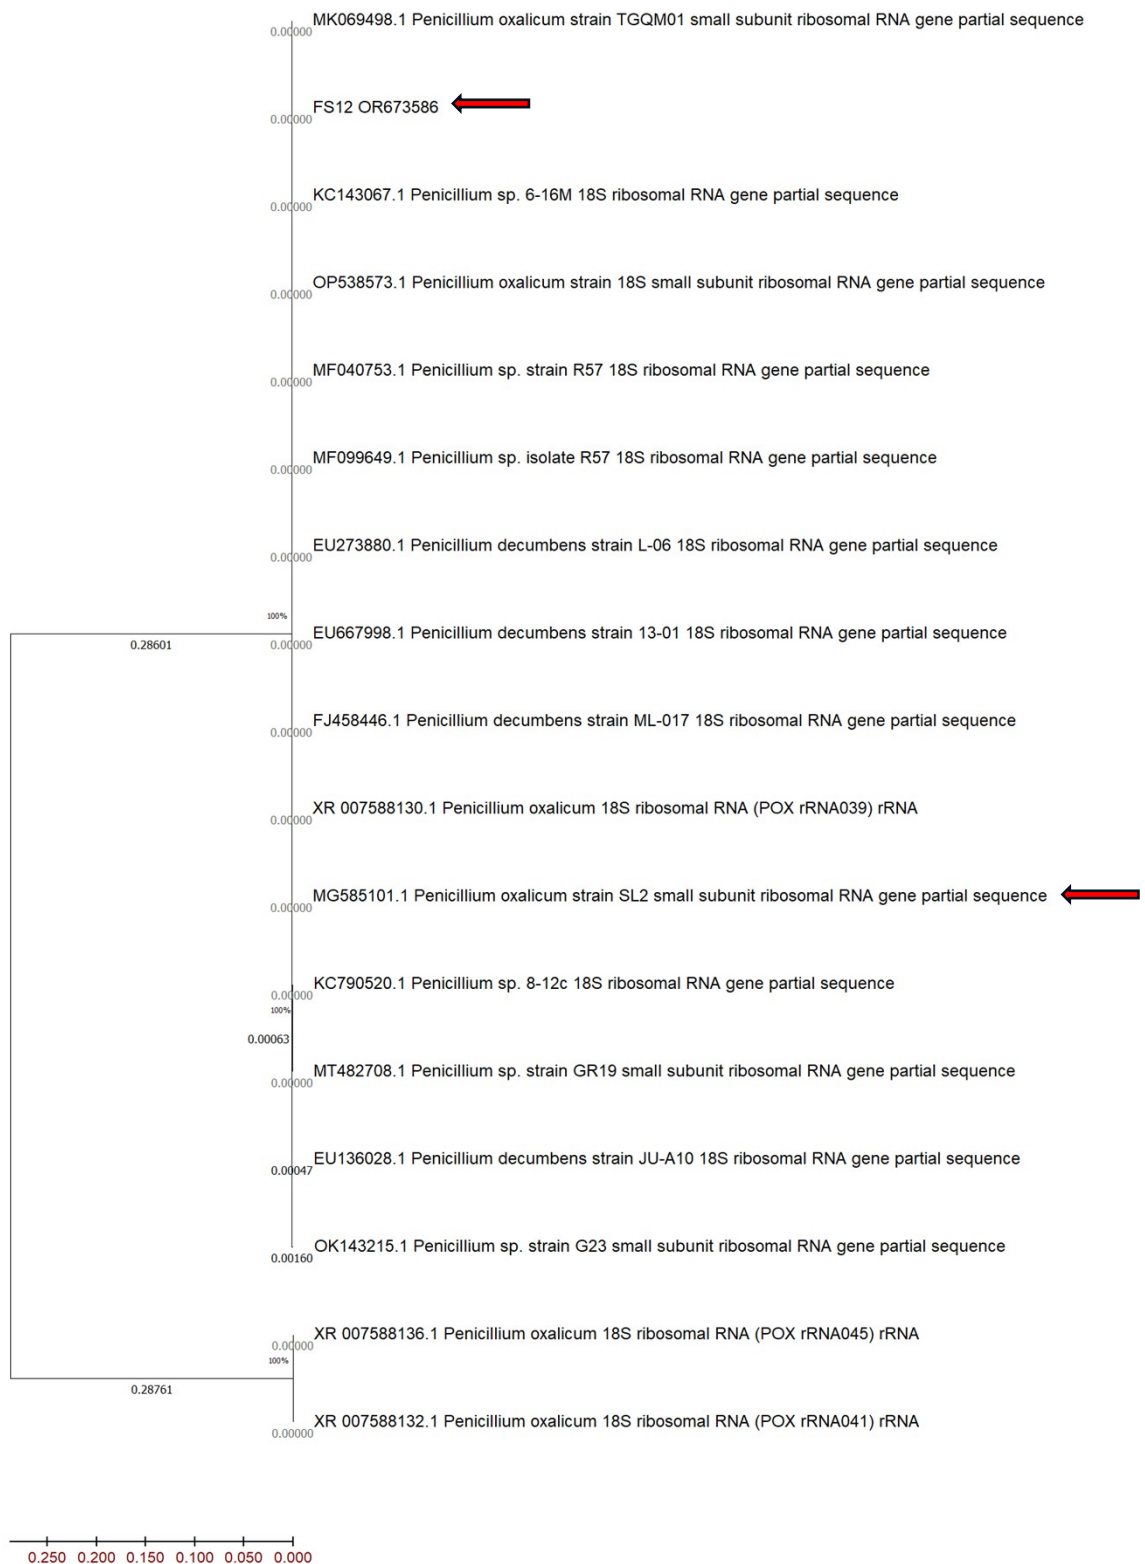

**Fig. S4: Evolutionary relationships of taxa phylogenetic tree of *P. oxalicum* FS12 associated with *Ficus sycomorus***

**Table S1: DPPH and FRAP assays results for *P. herbarum* and *P. oxalicum* total extracts and their fractions.**

| <b>Sample</b> | <b>DPPH IC<sub>50</sub> (µg/ml)</b> | <b>FRAP<br/>(µM Trolox equivalent /ml)</b> |
|---------------|-------------------------------------|--------------------------------------------|
| PHT           | <b>109.5 ± 6.44</b>                 | <b>438.611 ± 1.434</b>                     |
| PH1           | >500                                | 126.296 ± 19.950                           |
| PH2           | <b>5.649 ± 0.47</b>                 | <b>2926.48 ± 142.654</b>                   |
| PH3           | <b>38.95 ± 1.79</b>                 | <b>1275.93 ± 17.599</b>                    |
| POT           | 307.2 ± 20.90                       | 154.861 ± 1.145                            |
| PO1           | >500                                | 169.259 ± 42.375                           |
| PO2           | <b>198 ± 7.76</b>                   | <b>633.241 ± 65.5</b>                      |
| PO3           | 486.6 ± 30.44                       | 195.648 ± 40.307                           |
| Trolox        | 7.217 ± 0.309                       | -                                          |

**DPPH:** 2,2-Diphenyl-1-picrylhydrazyl, **FRAP:** Ferrous reducing activity power, **PHT:** *Phoma herbarum* total extract, **PH1:** *P. herbarum* n-hexane fraction, **PH2:** *P. herbarum* chloroform fraction, **PH3:** *P. herbarum* ethyl acetate fraction, **POT:** *Penicillium oxalicum* total extract, **PO1:** *P. oxalicum* n-hexane fraction, **PO2:** *P. oxalicum* chloroform fraction, **PO3:** *P. oxalicum* ethyl acetate fraction. **Trolox** was used as a positive control.



**Table S2: IC<sub>50</sub> values of SRB viability assay of *P. herbarum* and *P. oxalicum* total extracts and their fractions.**

| <b>sample</b> | <b>HepG2 (IC<sub>50</sub> µg/ml)</b> |
|---------------|--------------------------------------|
| PHT           | 528.9                                |
| PH1           | 198.53                               |
| PH2           | <b>77.8</b>                          |
| PH3           | 188.29                               |
| POT           | 340.4                                |
| PO1           | 343.4                                |
| PO2           | <b>7.695</b>                         |
| PO3           | 499.8                                |
| Dox.          | 0.87                                 |

**HepG2:** Hepatocellular carcinoma cell line, **Dox.:** Doxorubicin as positive control drug, **PHT:** *Phoma herbarum* total extract, **PH1:** *P. herbarum* *n*-hexane fraction, **PH2:** *P. herbarum* chloroform fraction, **PH3:** *P. herbarum* ethyl acetate fraction, **POT:** *Penicillium oxalicum* total extract, **PO1:** *P. oxalicum* *n*-hexane fraction, **PO2:** *P. oxalicum* chloroform fraction, **PO3:** *P. oxalicum* ethyl acetate fraction.



**Table S3: Nitric oxide inhibition for the anti-inflammatory activity of *P. herbarum* and *P. oxalicum* total extracts and their fractions.**

| sample | IC <sub>50</sub> µg/ml |
|--------|------------------------|
| PHT    | >1000                  |
| PH1    | <b>17.82</b>           |
| PH2    | <b>26.51</b>           |
| PH3    | 76.09                  |
| POT    | 390.2                  |
| PO1    | 65.99                  |
| PO2    | <b>14.68</b>           |
| PO3    | 317.0                  |
| L-NAME | 7.316                  |

**PHT:** *Phoma herbarum* total extract, **PH1:** *P. herbarum* *n*-hexane fraction, **PH2:** *P. herbarum* chloroform fraction, **PH3:** *P. herbarum* ethyl acetate fraction, **POT:** *Penicillium oxalicum* total extract, **PO1:** *P. oxalicum* *n*-hexane fraction, **PO2:** *P. oxalicum* chloroform fraction, **PO3:** *P. oxalicum* ethyl acetate fraction, Nitro-L-arginine methyl ester hydrochloride (L-NAME) positive control.

**Table S4: Antimicrobial and antibiofilm screening of *P. herbarum* and *P. oxalicum* total extracts and their fractions.**

| Sample      | Inhibition zone in mm |    |    | MIC mg/ml |         |          | MBIC |
|-------------|-----------------------|----|----|-----------|---------|----------|------|
|             | PA                    | SA | CA | PA        | SA      | CA       | PA   |
| PHT         | 25                    | 23 | 24 | 3         | 3       | 2        | 10   |
| PH1         | 12                    | 15 | 15 | 8         | 3       | 3        | 1.25 |
| PH2         | 35                    | 31 | 32 | 4         | 3       | 2        | 5    |
| PH3         | 22                    | 26 | 23 | 3         | 3       | 2        | 10   |
| POT         | 14                    | 18 | 14 | 6         | 3       | 4        | 20   |
| PO1         | 10                    | 17 | 11 | 12        | 3       | 4        | 2.5  |
| PO2         | 10                    | 19 | 10 | 12        | 4       | 3        | 20   |
| PO3         | 16                    | 29 | 11 | 12        | 6       | 4        | 5    |
| -ve control | 10                    | 10 | 10 | 16        | 6       | 4        | 20   |
| Gentamycin  | 34                    | 40 | 36 | 0.0125    | 0.00625 | 0.003125 | -    |

**MIC:** Minimum Inhibitory Concentration, **MBIC:** Minimum Biofilm Inhibitory Concentration, **SA:** *Staphylococcus aureus* ATCC-6538, **PA:** *Pseudomonas aeruginosa* ATCC-9027, **CA:** *Candida albicans* ATCC-10231, **PHT:** *Phoma herbarum* total extract, **PH1:** *P. herbarum* n-hexane fraction, **PH2:** *P. herbarum* chloroform fraction, **PH3:** *P. herbarum* ethyl acetate fraction, **POT:** *Penicillium oxalicum* total extract, **PO1:** *P. oxalicum* n-hexane fraction, **PO2:** *P. oxalicum* chloroform fraction, **PO3:** *P. oxalicum* ethyl acetate fraction, Gentamycin was used as a positive control. The zone diameter for the agar well diffusion method is 10 mm.

**Table S5: In vitro  $\alpha$ -glucosidase inhibitory activity of *P. herbarum* and *P. oxalicum* total extracts and their fractions.**

| Sample   | IC50 ( $\mu\text{g/ml}$ ) | Inhibition<br>1000 ( $\mu\text{g/ml}$ ) |
|----------|---------------------------|-----------------------------------------|
| PHT      | <b>79.17</b>              | <b>95.43 <math>\pm</math> 1.47</b>      |
| PH1      | >1000                     | 0.40 $\pm$ 0.26                         |
| PH2      | <b>14.91</b>              | <b>100 <math>\pm</math> 0.06</b>        |
| PH3      | <b>148.5</b>              | <b>95.43 <math>\pm</math> 1.47</b>      |
| PO       | >1000                     | 36.51 $\pm$ 0.99                        |
| PO1      | >1000                     | 27.07 $\pm$ 1.09                        |
| PO2      | >1000                     | <b>46.16 <math>\pm</math> 1.32</b>      |
| PO3      | >1000                     | 37.15 $\pm$ 1.55                        |
| Acarbose | 224.0                     | 77.16 $\pm$ 2.98                        |

**PHT:** *Phoma herbarum* total extract, **PH1:** *P. herbarum* *n*-hexane fraction, **PH2:** *P. herbarum* chloroform fraction, **PH3:** *P. herbarum* ethyl acetate fraction, **POT:** *Penicillium oxalicum* total extract, **PO1:** *P. oxalicum* *n*-hexane fraction, **PO2:** *P. oxalicum* chloroform fraction, **PO3:** *P. oxalicum* ethyl acetate fraction., Acarbose reference as a positive control.

**Table S6: Identified compounds of *P. herbarum* chloroform fraction (PH2) using LC-MS.**

| SN | Compound Name                     | Rt    | M+H (m/z) | MF                                                            | Exact Mass | Reported Source                                        | Class                          | Ref. |
|----|-----------------------------------|-------|-----------|---------------------------------------------------------------|------------|--------------------------------------------------------|--------------------------------|------|
| 1  | Mevalonolactone <b>(1)</b>        | 1.05  | 131.0782  | C <sub>6</sub> H <sub>10</sub> O <sub>3</sub>                 | 130.06     | <i>Pestalotiopsis</i> sp. & <i>Penicillium solitum</i> | Lactone                        | 1,2  |
| 2  | Phomasparapyrone A                | 2.11  | 213.1650  | C <sub>10</sub> H <sub>12</sub> O <sub>5</sub>                | 212.06     | <i>Phomopsis asparagi</i>                              | pyrone derivative              | 3    |
| 3  | 8-hydroxy-Pregaliellalactone B    | 3.13  | 197.1197  | C <sub>11</sub> H <sub>16</sub> O <sub>3</sub>                | 196.11     | <i>Phoma</i> sp.                                       | polyketide                     | 4    |
| 4  | Phomactin B                       | 6.6   | 321.1858  | C <sub>19</sub> H <sub>28</sub> O <sub>4</sub>                | 320.2      | <i>Phoma</i> sp.                                       | Diterpenes                     | 5-7  |
| 5  | Tersone F                         | 7.2   | 344.1830  | C <sub>19</sub> H <sub>21</sub> NO <sub>5</sub>               | 343.14     | <i>Phomopsis tersa</i>                                 | pyridine alkaloid              | 8    |
| 6  | Phomaether A                      | 8.2   | 423.2958  | C <sub>21</sub> H <sub>26</sub> O <sub>9</sub>                | 422.16     | <i>Phoma</i> sp.                                       | diphenyl ether                 | 9    |
| 7  | Barcelonyl acetate <b>(2)</b>     | 8.4   | 335.0775  | C <sub>17</sub> H <sub>18</sub> O <sub>7</sub>                | 334.33     | <i>New</i>                                             | diphenyl                       | -    |
| 8  | Barceloneic acid C                | 8.5   | 303.1201  | C <sub>16</sub> H <sub>14</sub> O <sub>6</sub>                | 302.08     | <i>Phoma</i> sp.                                       | polyketide                     | 10   |
| 9  | Terezine N                        | 9.2   | 291.1367  | C <sub>15</sub> H <sub>18</sub> N <sub>2</sub> O <sub>4</sub> | 290.12     | <i>P. herbarum</i>                                     | terezine derivative            | 11   |
| 10 | Terezine L                        | 10.5  | 451.3011  | C <sub>21</sub> H <sub>26</sub> N <sub>2</sub> O <sub>9</sub> | 450.16     | <i>P. herbarum</i>                                     | Pyrazine derivative            | 12   |
| 11 | Alterporriol S                    | 14.10 | 613.3747  | C <sub>31</sub> H <sub>32</sub> O <sub>13</sub>               | 612.18     | <i>Alternaria</i> sp.                                  | anthraquinone derivatives      | 13   |
| 12 | Phomalide                         | 15.4  | 558.4356  | C <sub>30</sub> H <sub>43</sub> N <sub>3</sub> O <sub>7</sub> | 557.31     | <i>Phoma</i> sp.                                       | Cyclic polypeptide derivatives | 14   |
| 13 | Glycerol monolinoleate <b>(3)</b> | 22.78 | 355.3488  | C <sub>21</sub> H <sub>38</sub> O <sub>4</sub>                | 354.28     | Saposhnikovia divaricate plant root                    | glycerides                     | 15   |
| 14 | Ergosterol <b>(7)</b>             | 27.4  | 397.4515  | C <sub>28</sub> H <sub>44</sub> O                             | 396.34     | <i>P. oxalicum</i>                                     | Sterol                         | 16   |

**Rt:** Retention time, **MF:** Molecular Formula

**Table S7: Identified compounds of *P. oxalicum* chloroform fraction (PO2) using LC-MS.**

| SN | Compound Name                                           | Rt   | M+H (m/z) | MF                                                            | Exact Mass | Reported Source                                  | Class                    | Ref.  |
|----|---------------------------------------------------------|------|-----------|---------------------------------------------------------------|------------|--------------------------------------------------|--------------------------|-------|
| 1  | Mevalonolactone ( <b>1</b> )                            | 1.0  | 131.0062  | C <sub>6</sub> H <sub>10</sub> O <sub>3</sub>                 | 130.06     | <i>Pestalotiopsis sp.</i> ,<br><i>P. solitum</i> | Pyrone derivative        | 1,2   |
| 2  | 4-Hydroxyphenyl acetic acid ( <b>4</b> )                | 1.0  | 153.0181  | C <sub>8</sub> H <sub>8</sub> O <sub>3</sub>                  | 152.05     | <i>Gaeumannomyces sp.</i>                        | Phenolic acid            | 17    |
| 3  | 1,3-Dihydroxypropan-2-yl 2,4-dihydroxy-6-methylbenzoate | 4.5  | 243.1353  | C <sub>11</sub> H <sub>14</sub> O <sub>6</sub>                | 242.08     | <i>P. chrysogenum</i>                            | Phenolic acid            | 18    |
| 4  | 2-(4-Hydroxybenzyl)quinazolin-4(3H)-one                 | 6.5  | 253.1020  | C <sub>15</sub> H <sub>12</sub> N <sub>2</sub> O <sub>2</sub> | 252.09     | <i>P. oxalicum</i>                               | Alkaloid                 | 19    |
| 5  | Penipanoid A                                            | 6.6  | 296.1747  | C <sub>16</sub> H <sub>13</sub> N <sub>3</sub> O <sub>3</sub> | 295.1      | <i>P. oxalicum</i>                               | Alkaloid                 | 20    |
| 6  | 2,5-dimethyl-7-Hydroxychromone                          | 7.0  | 191.0760  | C <sub>11</sub> H <sub>10</sub> O <sub>3</sub>                | 190.06     | <i>P. oxalicum</i>                               | Chromanone derivatives   | 21    |
| 7  | Coniochaetone J                                         | 7.5  | 263.0691  | C <sub>14</sub> H <sub>14</sub> O <sub>5</sub>                | 262.08     | <i>P. oxalicum</i>                               | Chromone derivatives     | 22    |
| 8  | Meleagrins                                              | 7.9  | 434.2026  | C <sub>23</sub> H <sub>23</sub> N <sub>5</sub> O <sub>4</sub> | 433.17     | <i>P. oxalicum</i>                               | Alkaloid                 | 23    |
| 9  | Meleagrins A; Me ether                                  | 8.4  | 448.2773  | C <sub>24</sub> H <sub>25</sub> N <sub>5</sub> O <sub>4</sub> | 447.19     | <i>P. oxalicum</i>                               | Alkaloid                 | 20    |
| 10 | Penioxamide A                                           | 10.3 | 418.3284  | C <sub>27</sub> H <sub>35</sub> N <sub>3</sub> O              | 417.28     | <i>P. oxalicum</i>                               | Alkaloid                 | 20    |
| 11 | Altersolanol A ( <b>6</b> )                             | 12.9 | 337.3809  | C <sub>16</sub> H <sub>16</sub> O <sub>8</sub>                | 336.29     | <i>Stemphylium globuliferum</i>                  | Anthraquinone derivative | 24,25 |
| 12 | Secalonic acid D ( <b>5</b> )                           | 13.3 | 639.2608  | C <sub>32</sub> H <sub>30</sub> O <sub>14</sub>               | 638.16     | <i>P. oxalicum</i>                               | Xanthone derivative      | 26,27 |
| 13 | Ergosterol ( <b>7</b> )                                 | 27.4 | 397.4515  | C <sub>28</sub> H <sub>44</sub> O                             | 396.34     | <i>P. oxalicum</i>                               | Sterol                   | 16    |

**Rt:** Retention time, **MF:** Molecular Formula

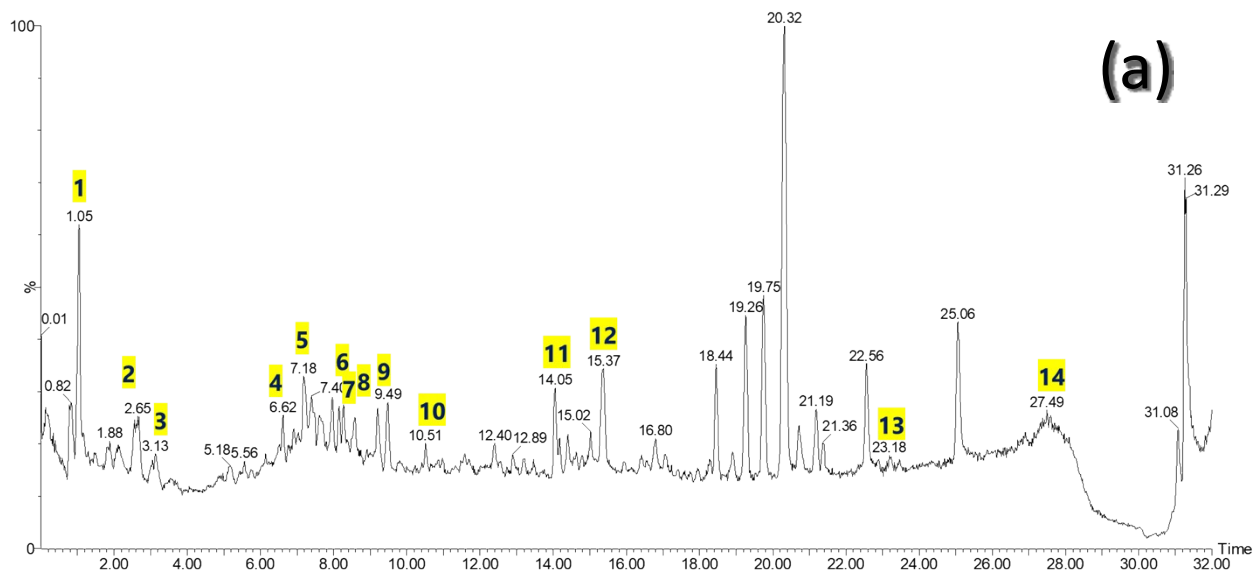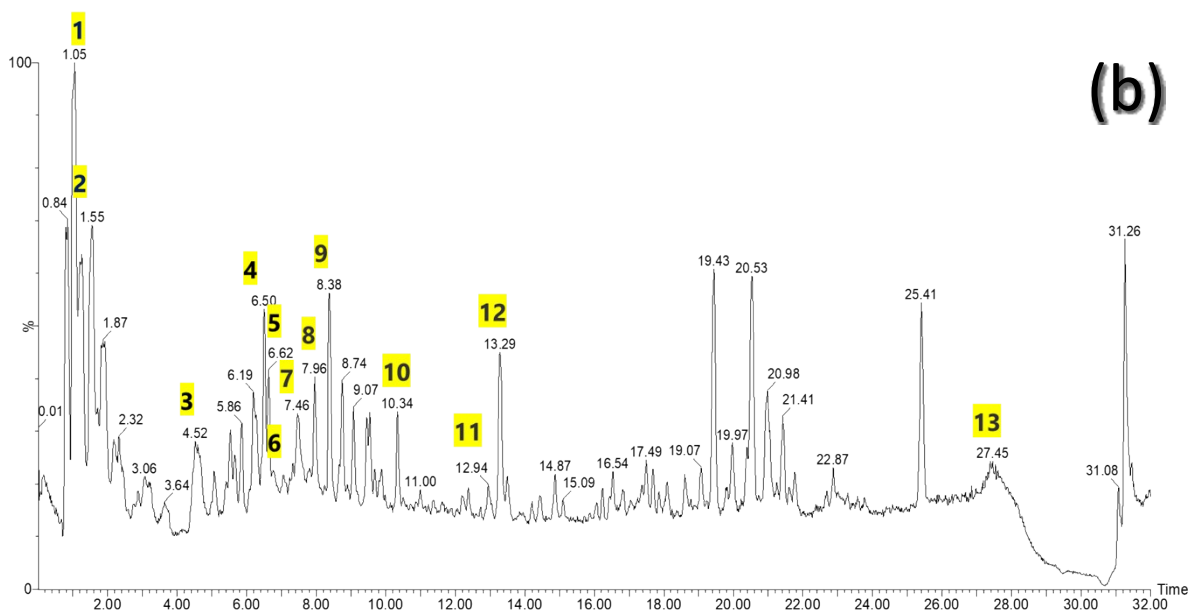

**Fig. S5: LC/MS Positive-ESI spectra of *P. herbarum* chloroform fraction (a) and *P. oxalicum* chloroform fraction (b)**

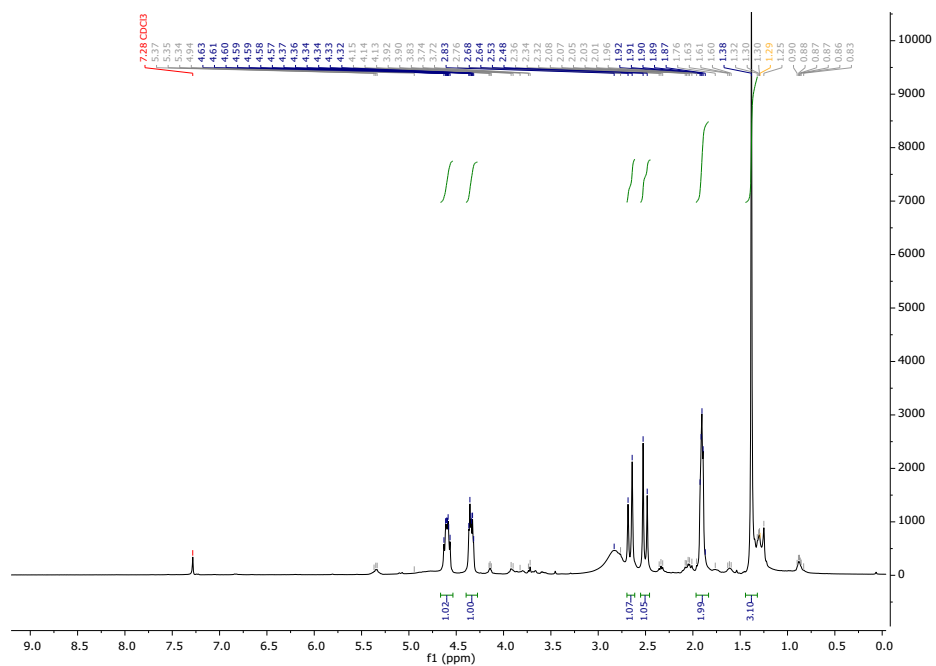

Fig. S6:  $^1\text{H-NMR}$  spectrum of mevalonolactone (1)

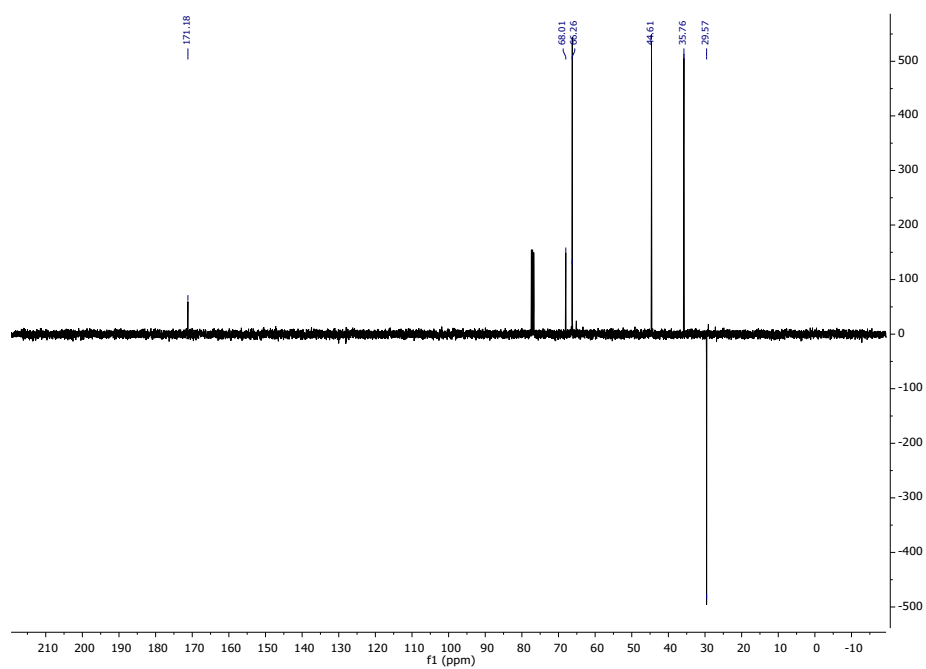

Fig. S7: APT NMR spectrum of mevalonolactone (1)



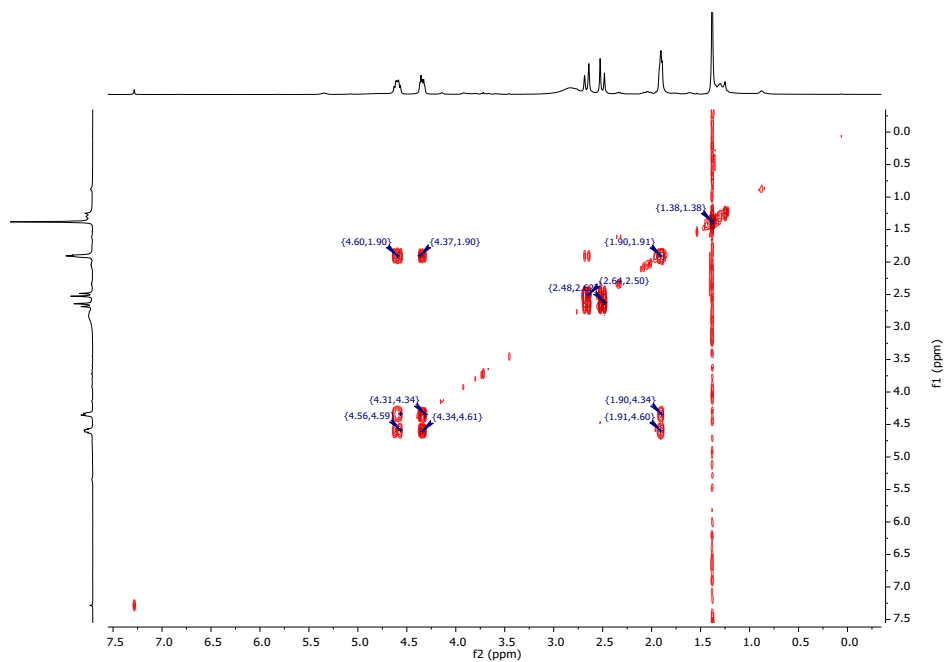

Fig. S8: H-H COSY spectrum of mevalonolactone (1)

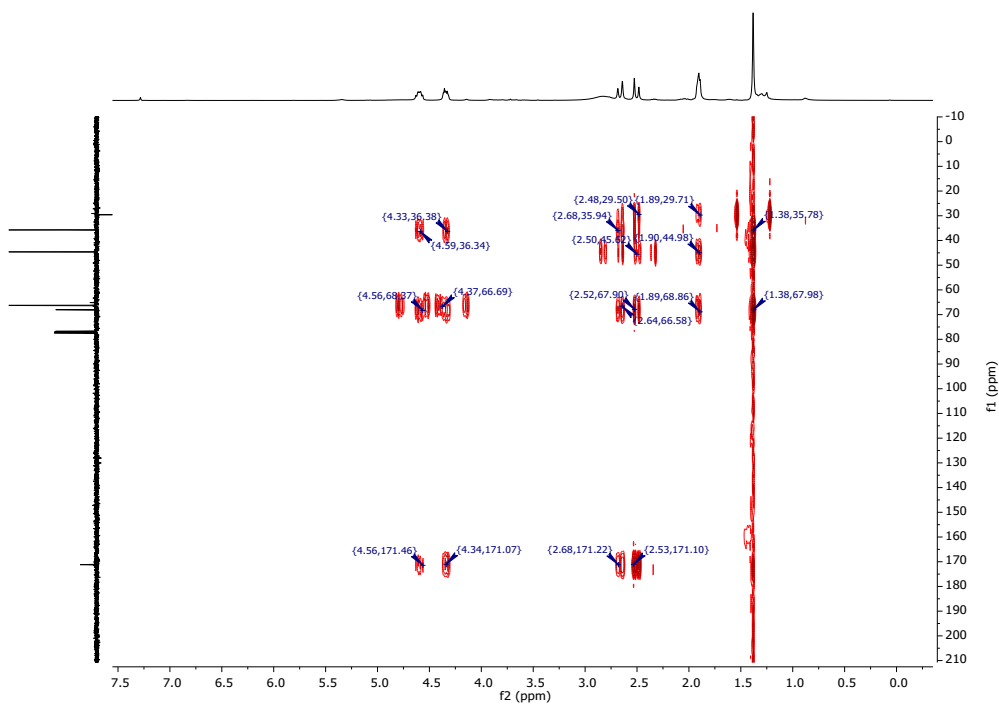

Fig. S9: HMBC spectrum of mevalonolactone (1)

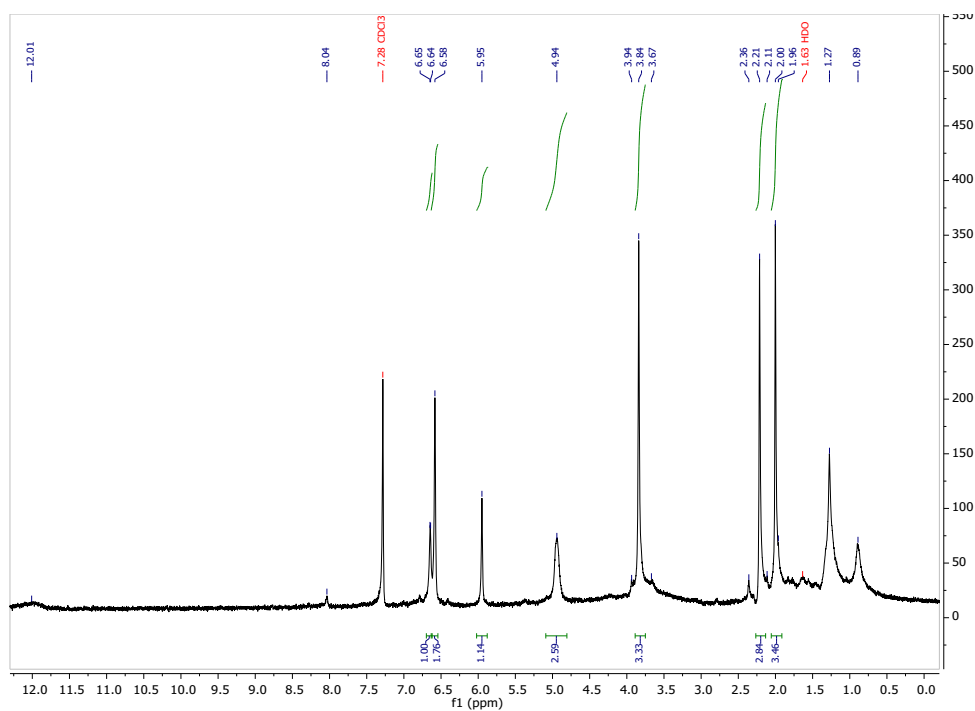

Fig. S10: <sup>1</sup>H-NMR spectrum of barcelonyl acetate (2)

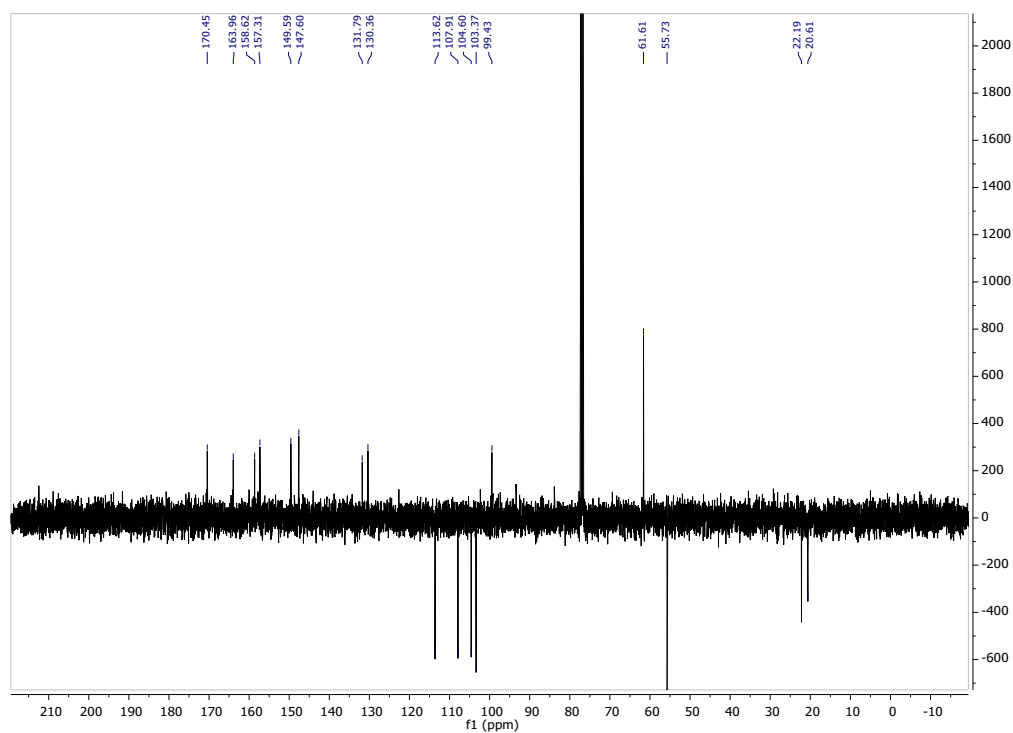

Fig. S11: APT spectrum of barcelonyl acetate (2)

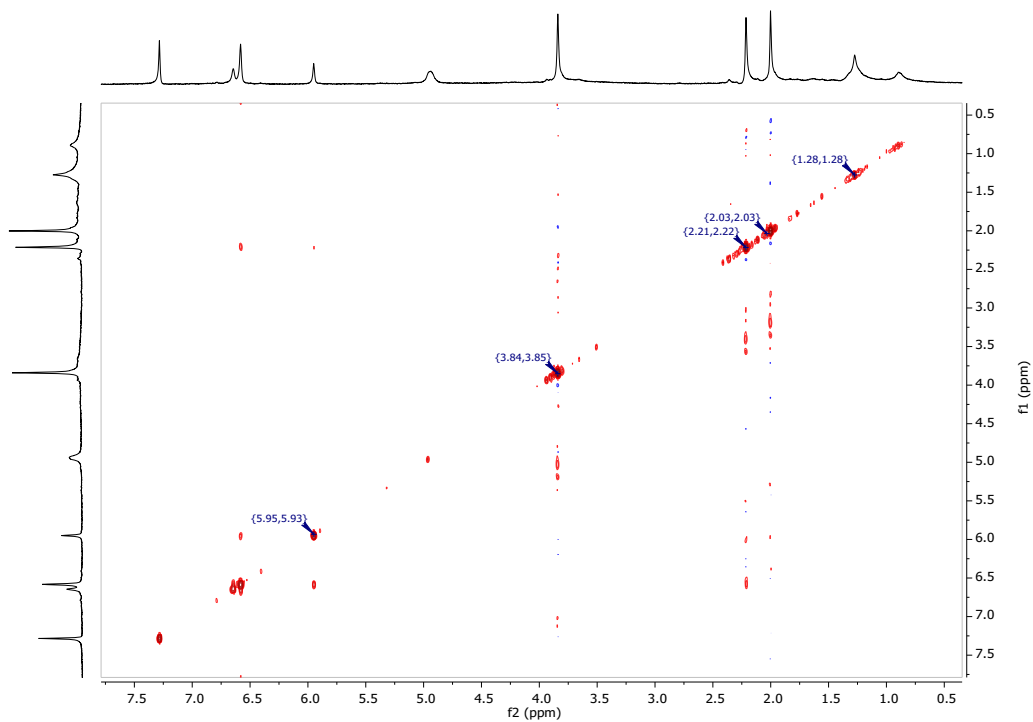

**Fig. S12: COSY spectrum of barcelonyl acetate (2)**

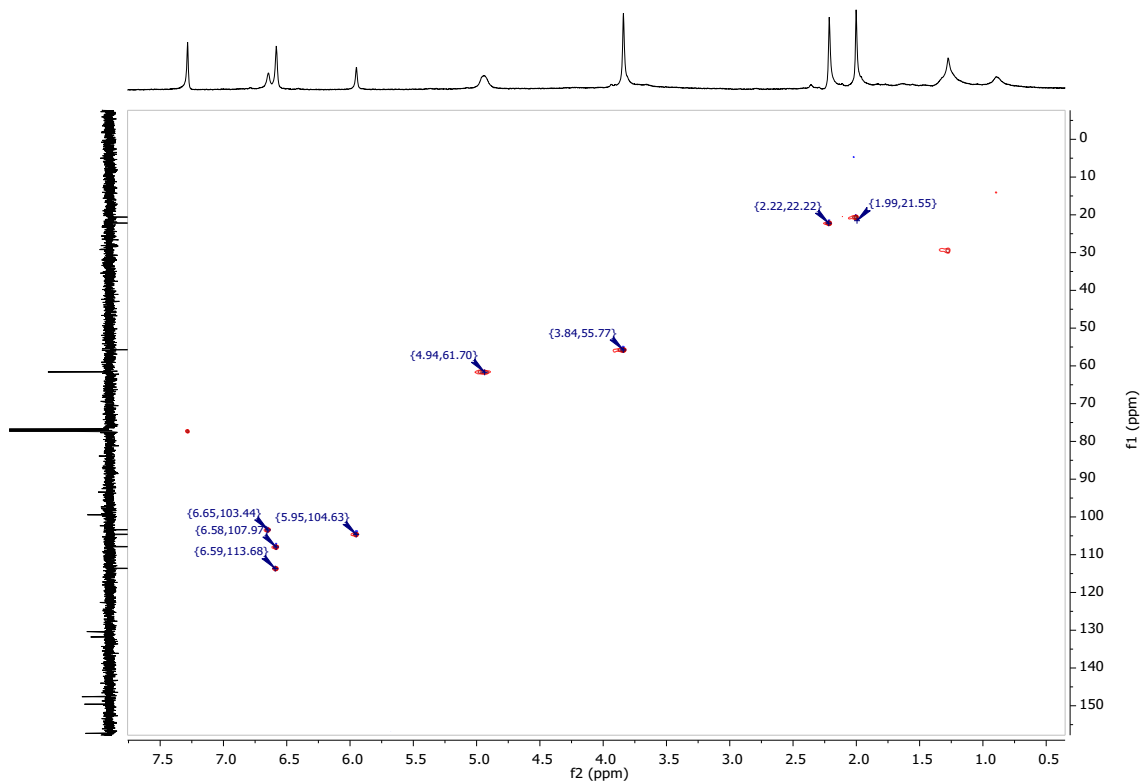

**Fig. S13: HSQC spectrum of barcelonyl acetate (2)**

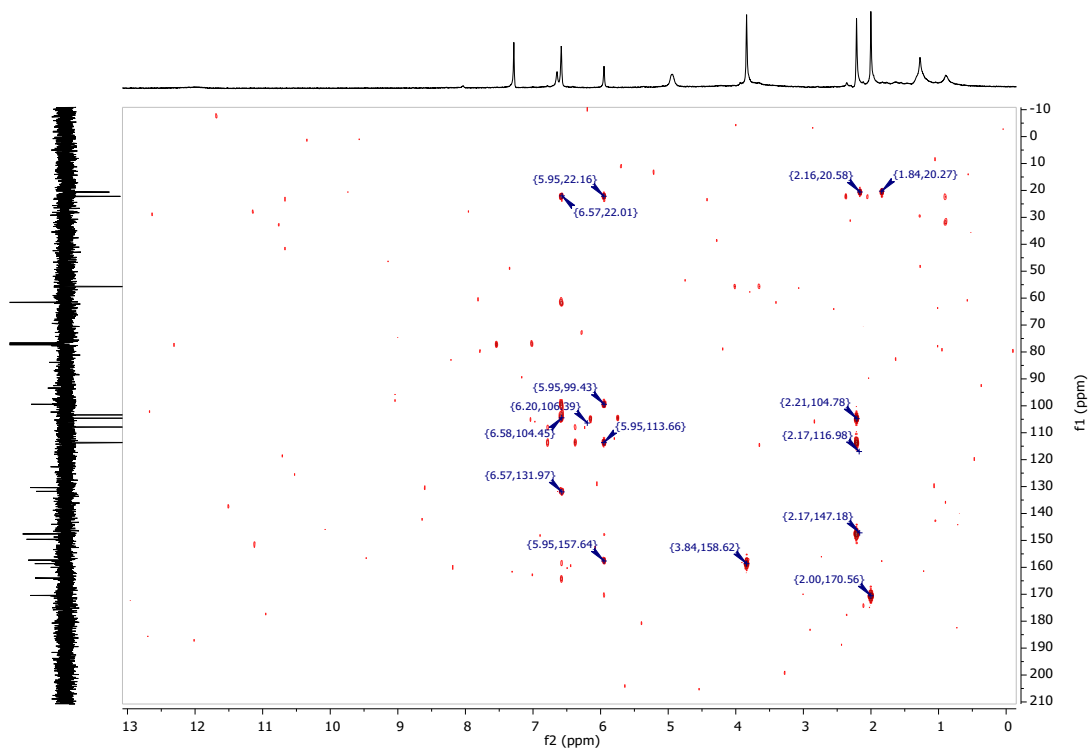

Fig. S14: HMBC spectrum of barcelonyl acetate (2)

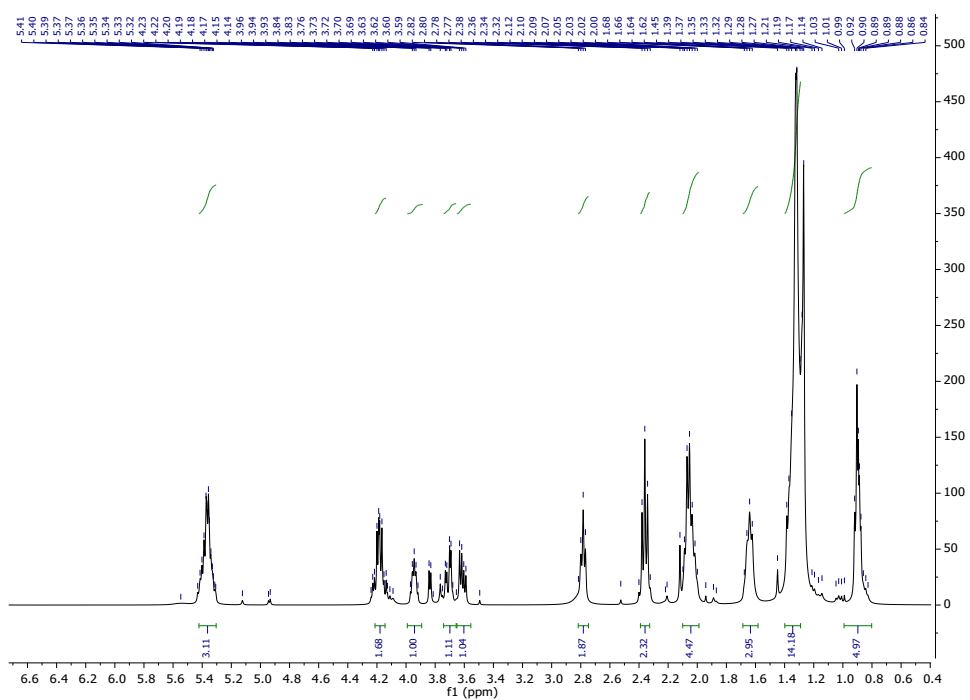

Fig. S15:  $^1\text{H}$ -NMR spectrum of glycerol monolinoleate (3)

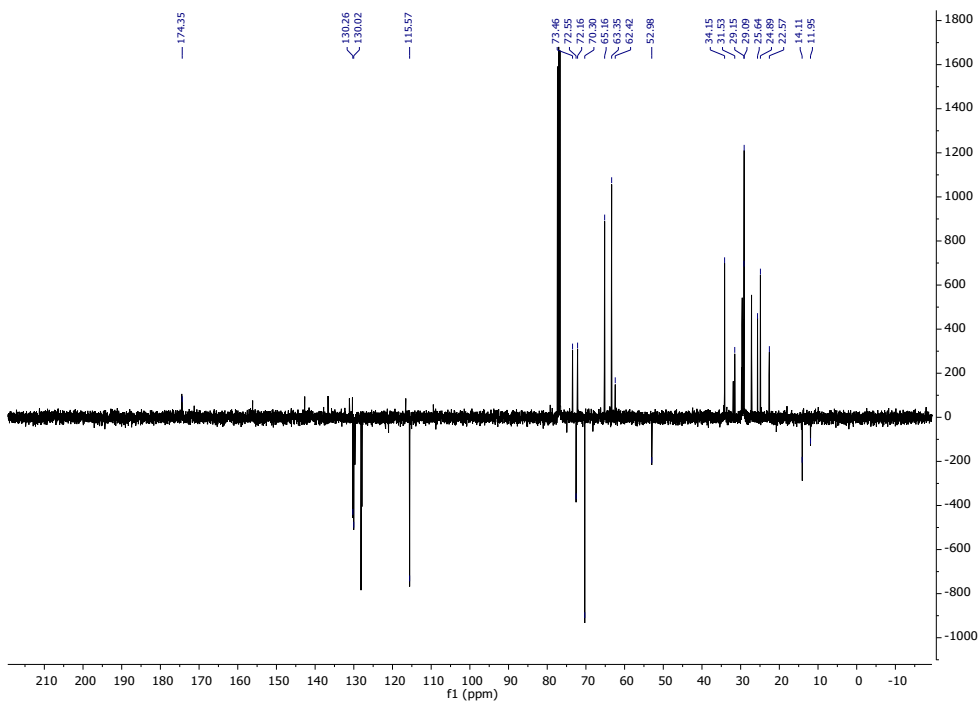

Fig. S16: APT spectrum of glycerol monolinoleate (3)

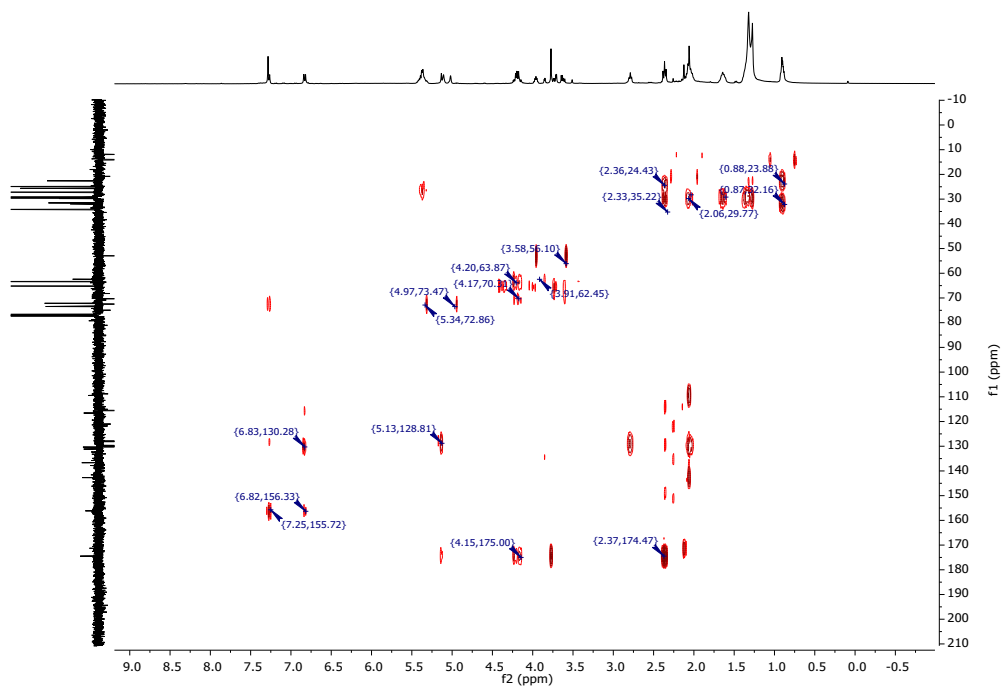

Fig. S17: HMBC spectrum of glycerol monolinoleate (3)

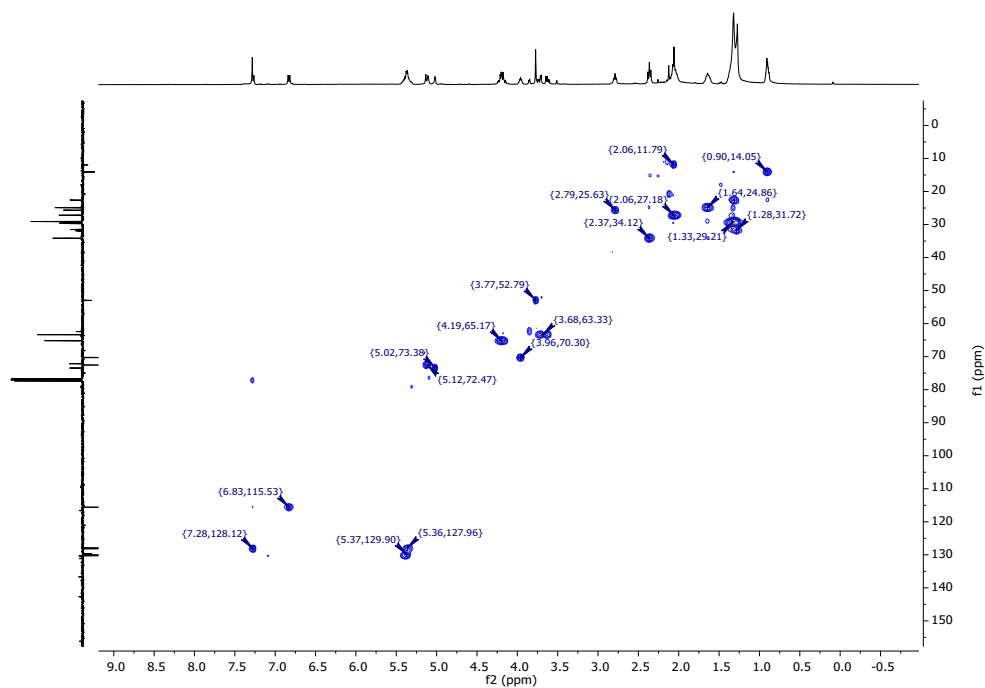

Fig. S18: HSQC spectrum of glycerol monolinoleate (3)

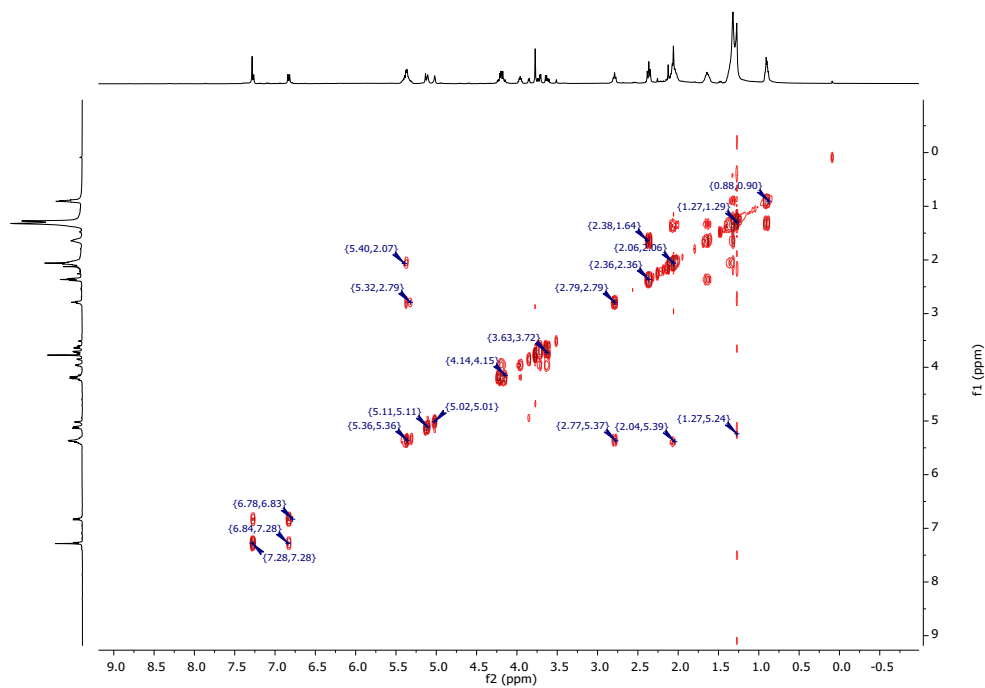

Fig. S19: H-H COSY spectrum of glycerol monolinoleate (3)

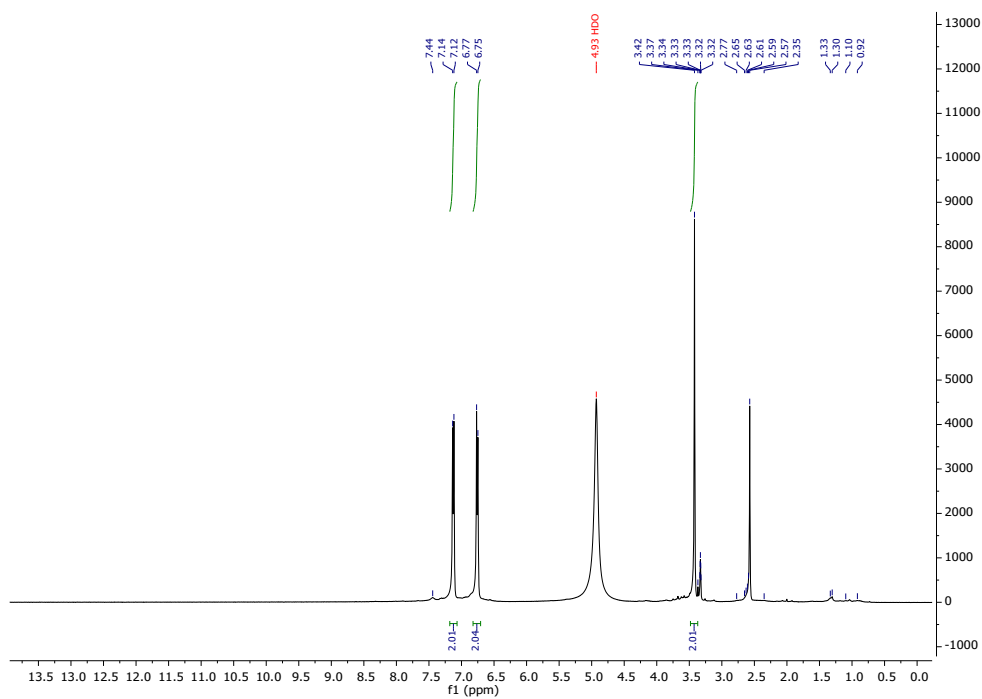

Fig. S20: <sup>1</sup>H-NMR spectrum of 4-hydroxyphenyl acetic acid (4)



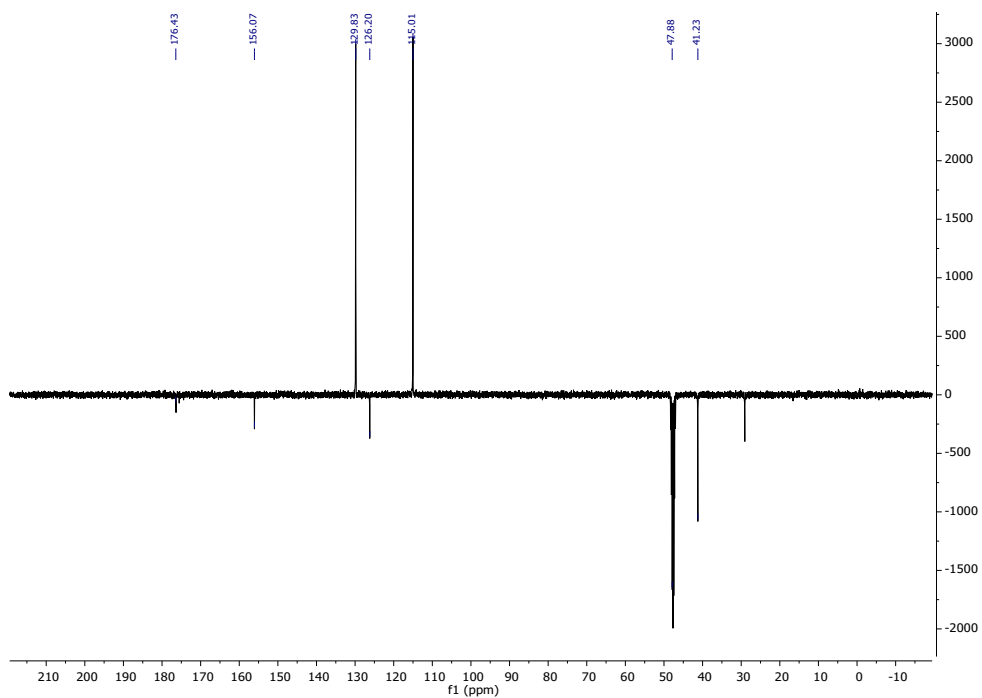

**Fig. S21: APT spectrum of 4-hydroxyphenyl acetic acid (4)**

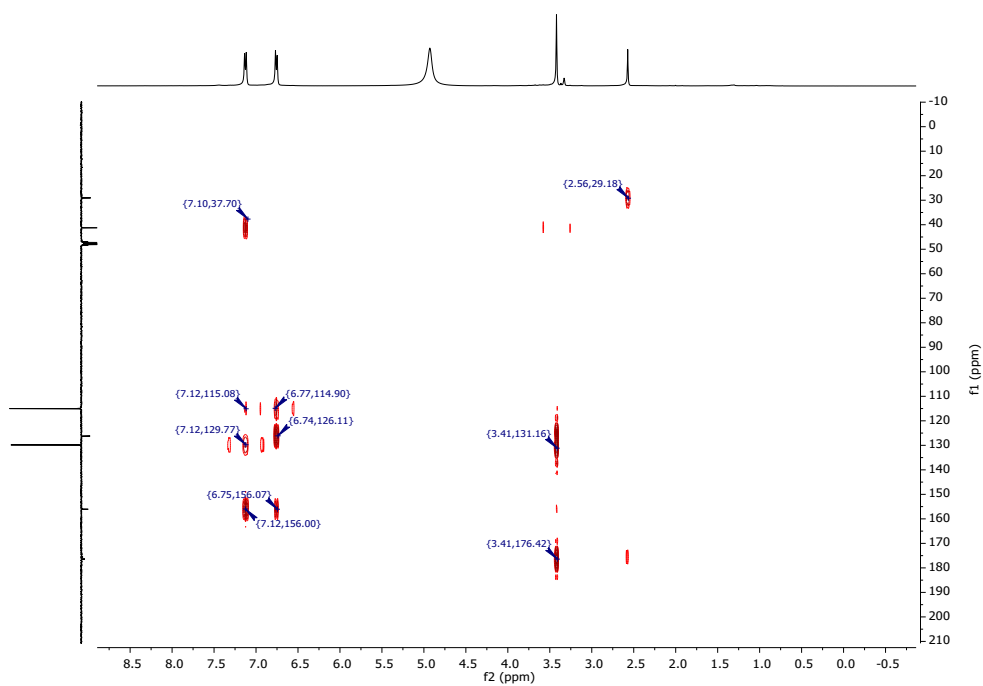

**Fig. S22: HMBC spectrum of 4-hydroxyphenyl acetic acid (4)**

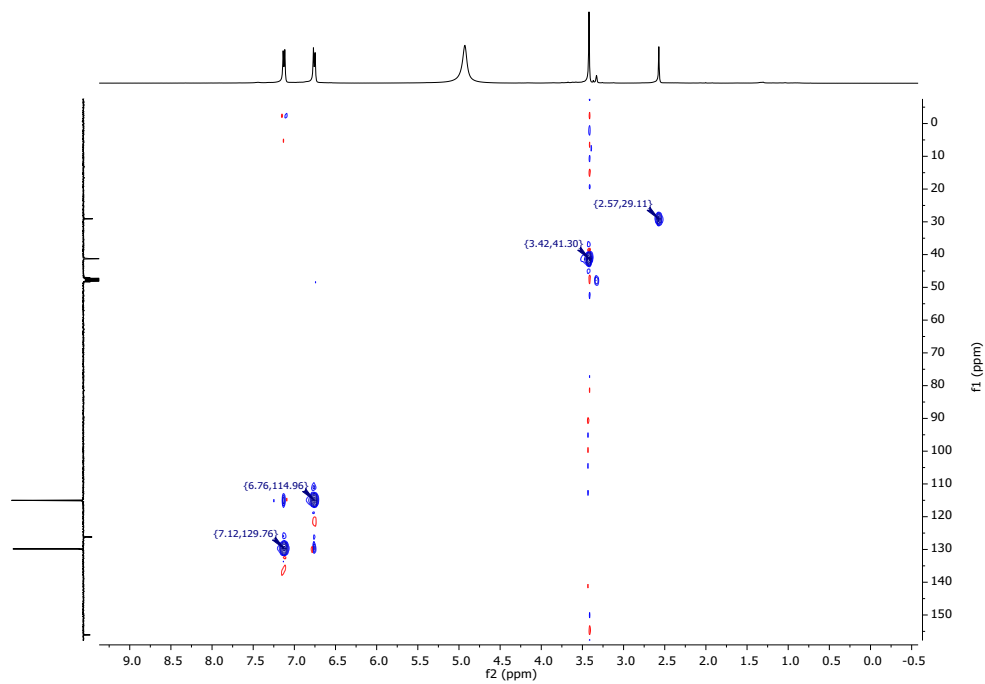

**Fig. S23: HSQC spectrum of 4-hydroxyphenyl acetic acid (4)**

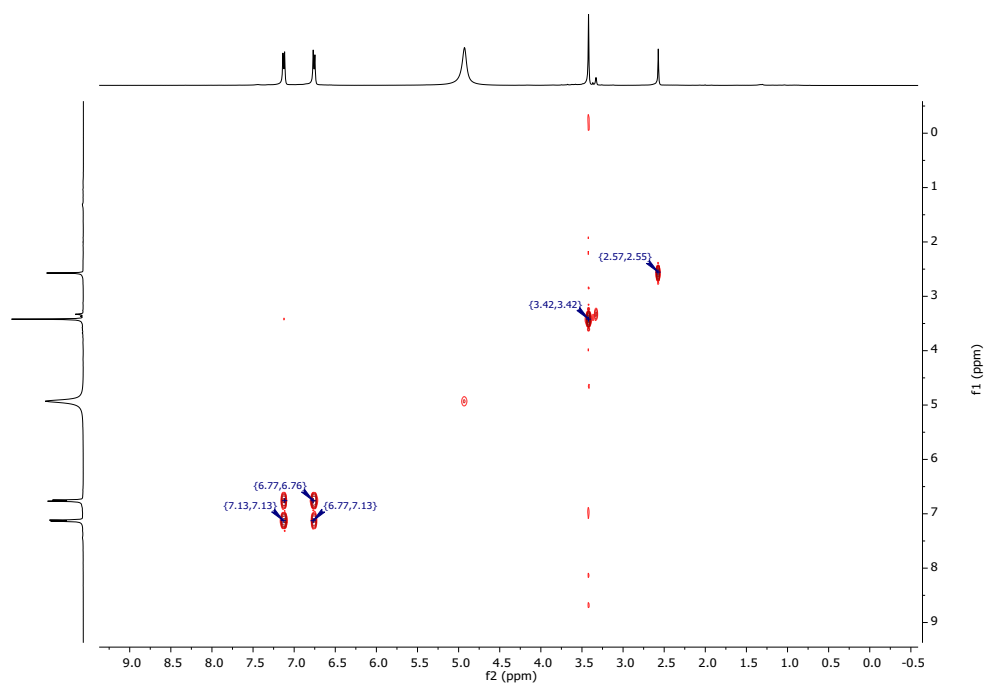

**Fig. S24: H-H COSY spectrum of 4-hydroxyphenyl acetic acid (4)**

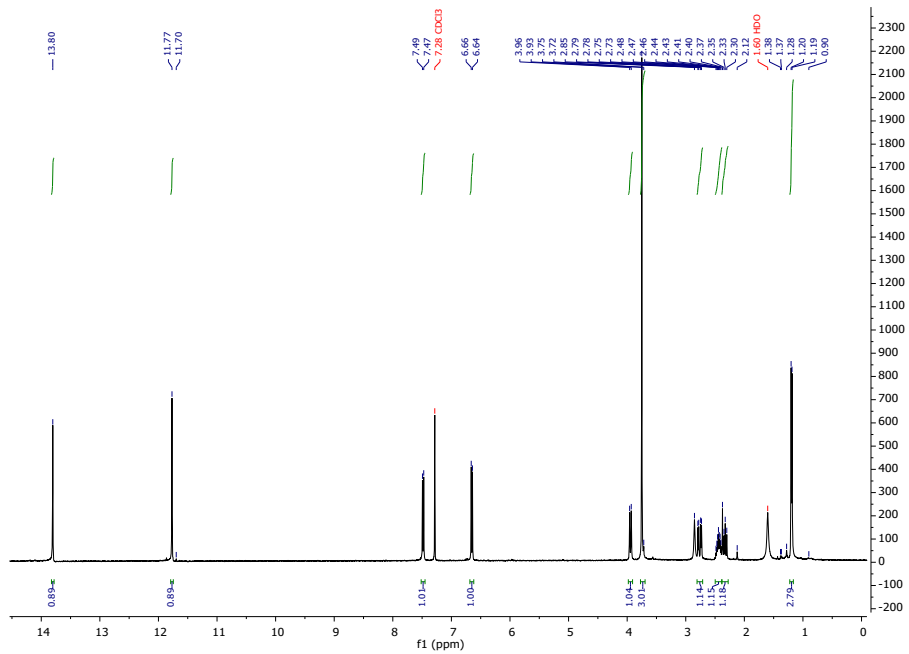

Fig. S25: <sup>1</sup>H-NMR spectrum of secalonic acid D (5)

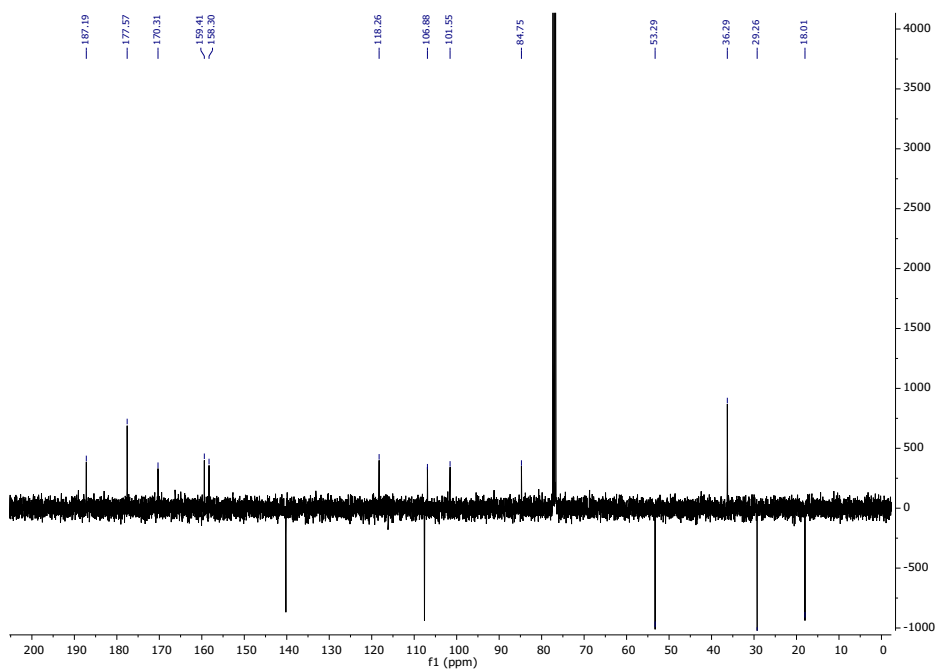

Fig. S26: APT spectrum of secalonic acid D (5)

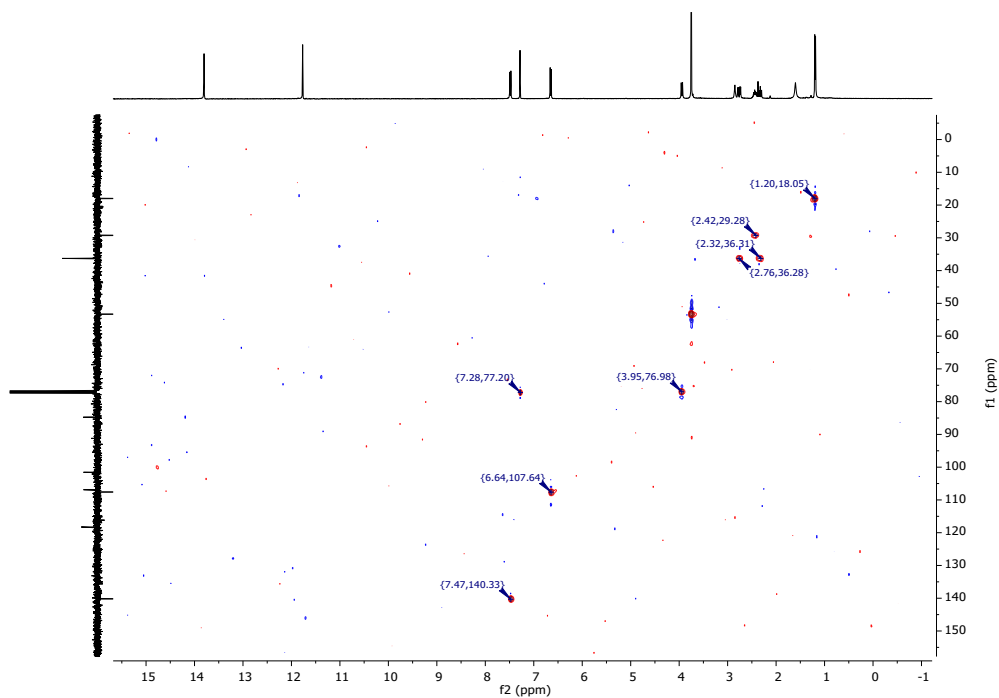

**Fig. S27: HSQC spectrum of secalonic acid D (5)**

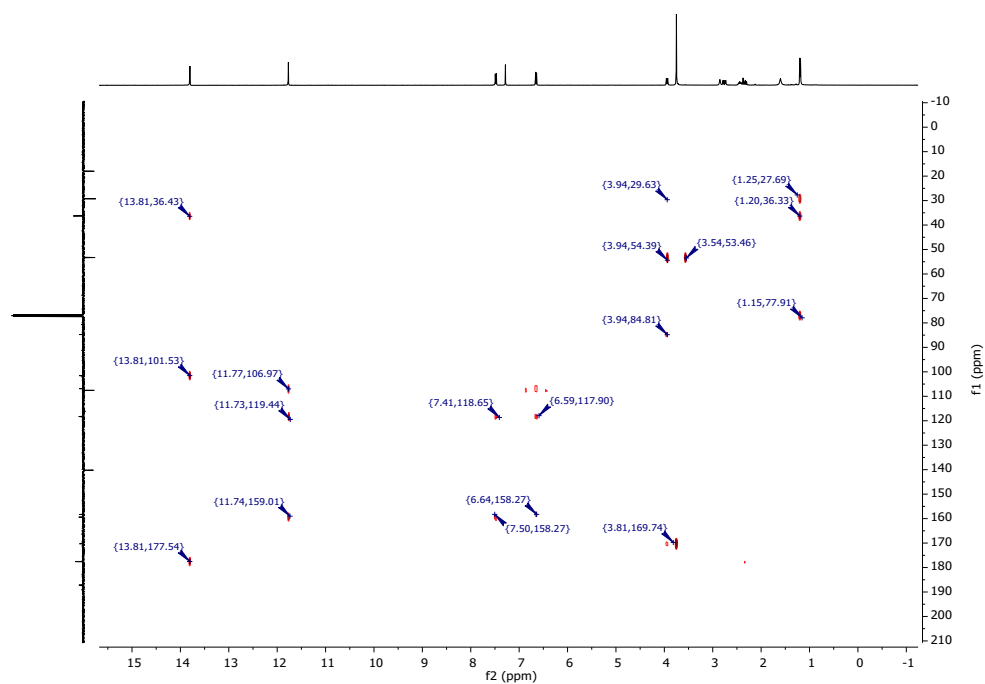

**Fig. S28: HMBC spectrum of secalonic acid D (5)**

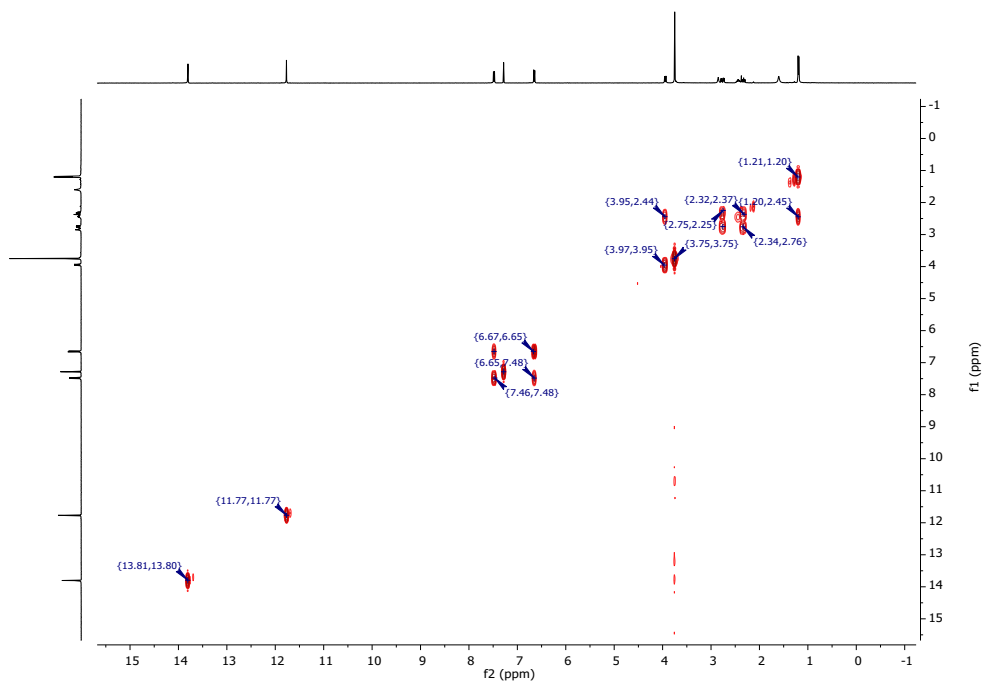

Fig. S29: H-H COSY spectrum of secalonic acid D (5)

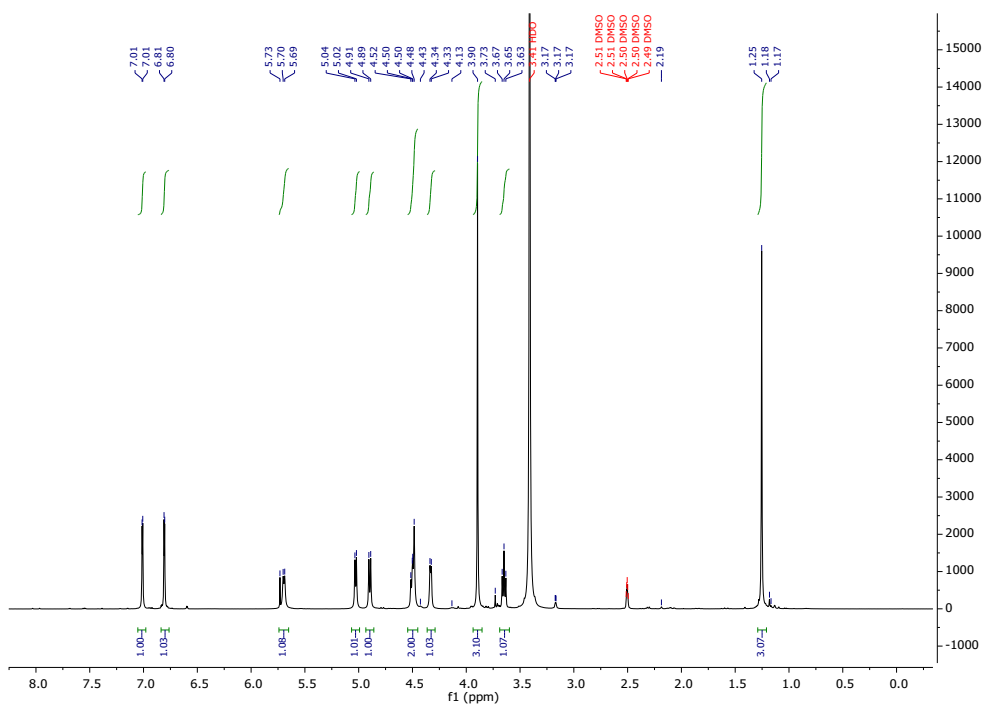

Fig. S30: <sup>1</sup>H-NMR spectrum of altersolanol A (6)

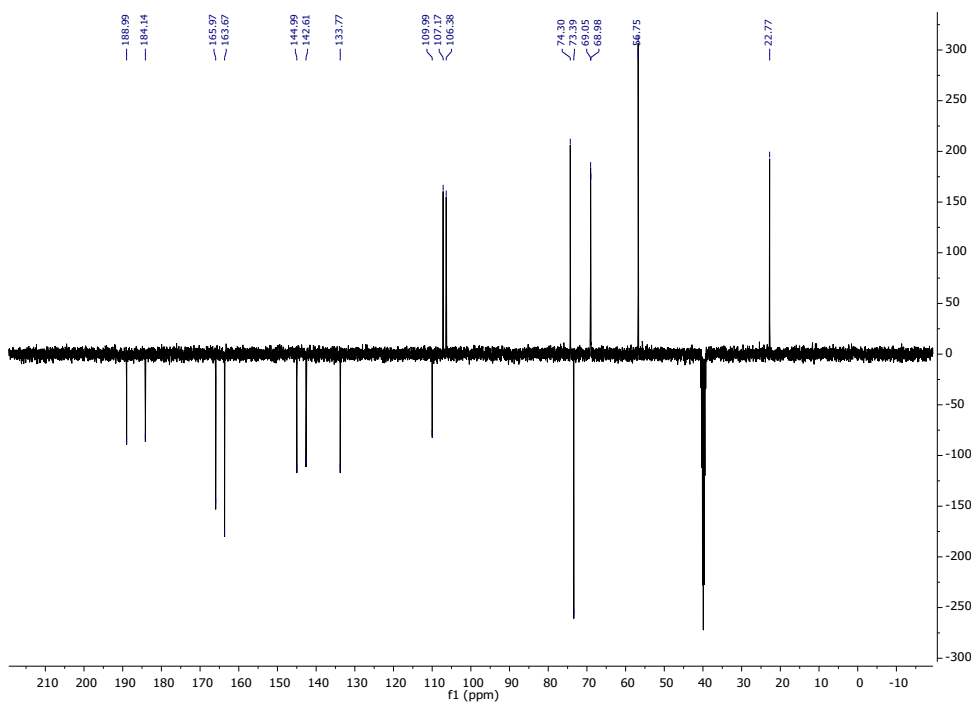

Fig. S31: APT spectrum of altersolanol A (6)

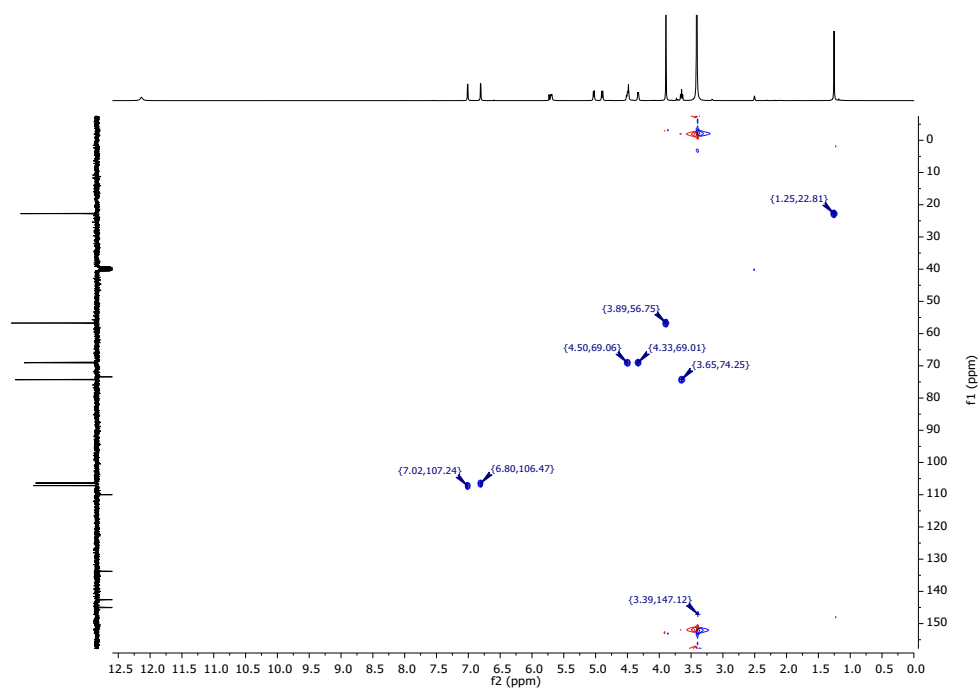

Fig. S32: HSQC spectrum of altersolanol A (6)

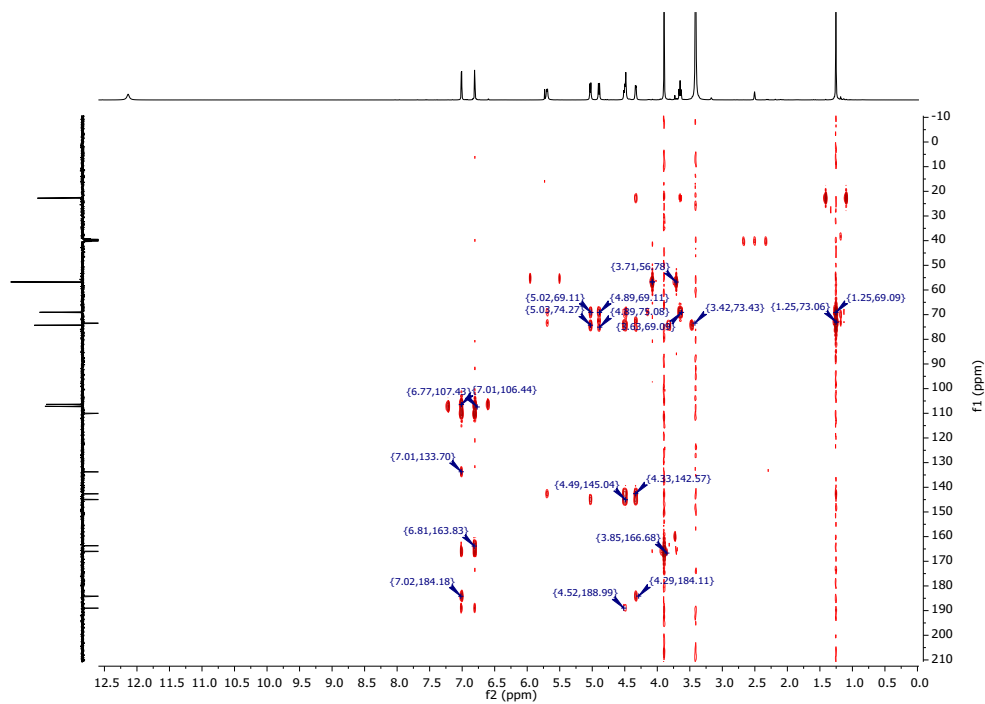

Fig. S33: HMBC spectrum of altersolanol A (6)

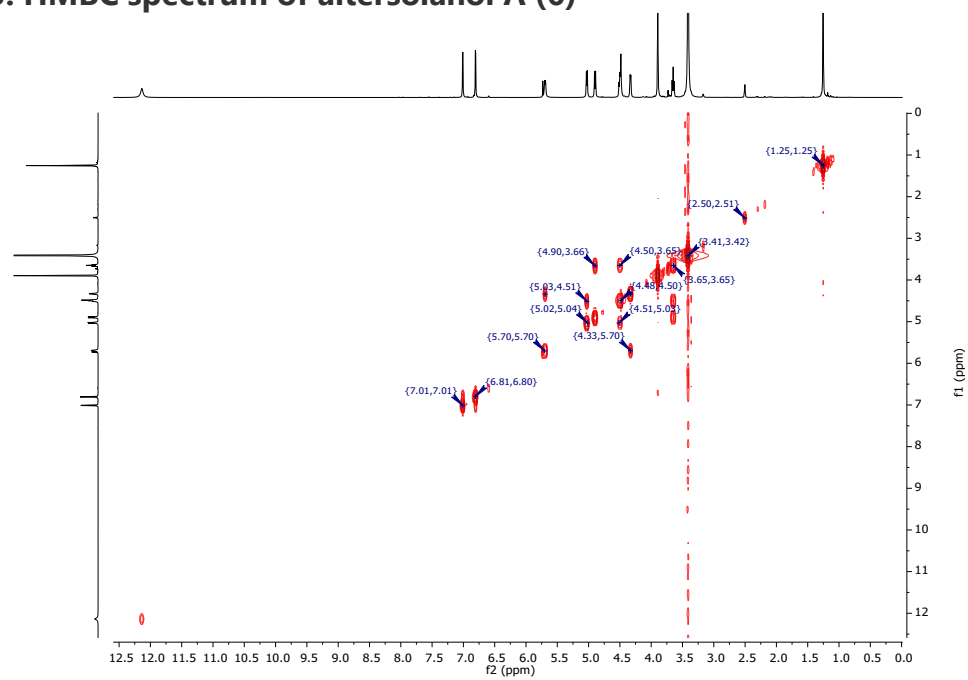

Fig. S34: H-H COSY spectrum of altersolanol A (6)



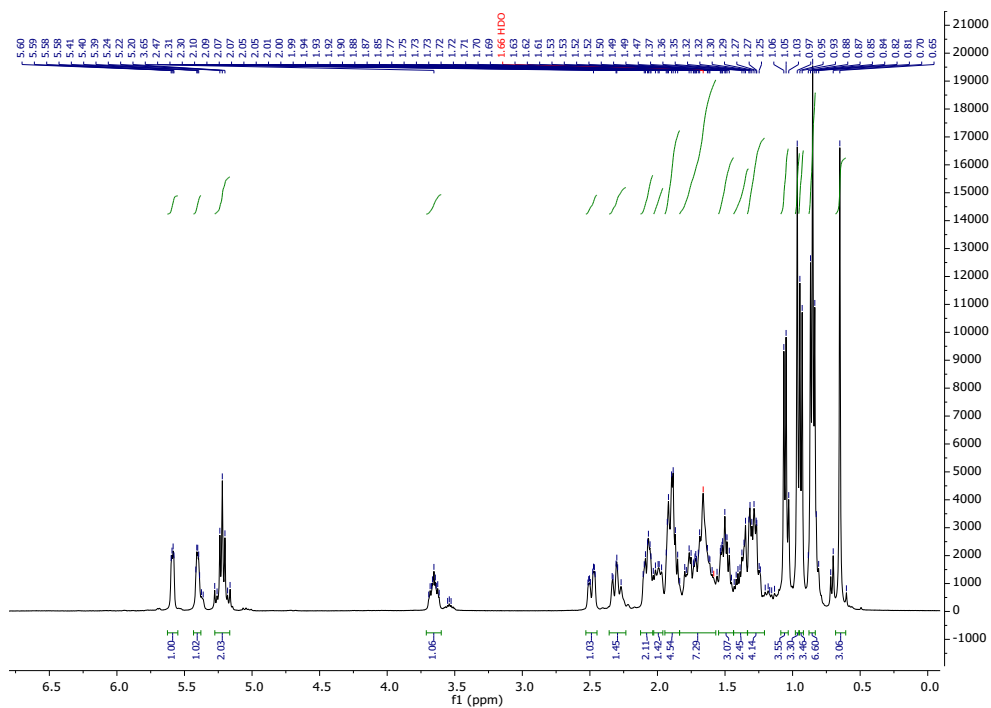

Fig. S35: <sup>1</sup>H-NMR spectrum of ergosterol (7)

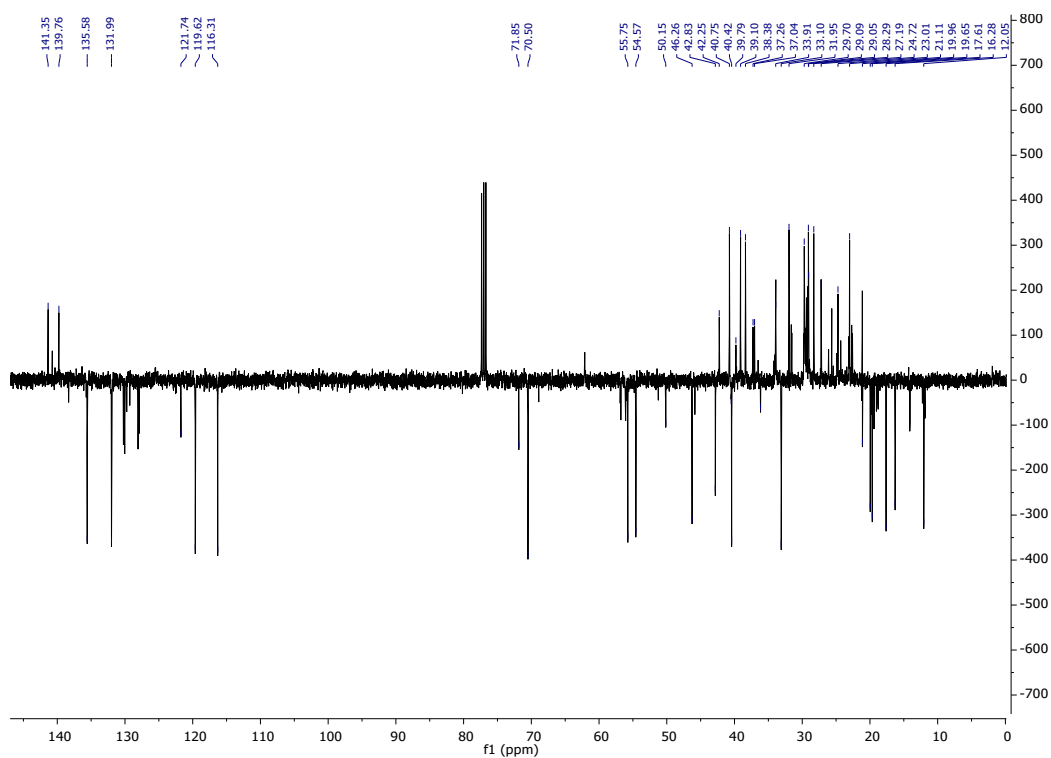

Fig. S36: APT spectrum of ergosterol (7)

**Table S8: *In silico* 2D and 3D interaction of the isolated compounds**

| 3D interaction                    | 2D interaction |
|-----------------------------------|----------------|
| <b>Co crystal (BIRB796)</b>       |                |
|                                   |                |
| <b>Mevalonolactone (1)</b>        |                |
|                                   |                |
| <b>Barcelonyl acetate (2)</b>     |                |
|                                   |                |
| <b>Glycerol monolinoleate (3)</b> |                |
|                                   |                |

Table S8: (Cont.)

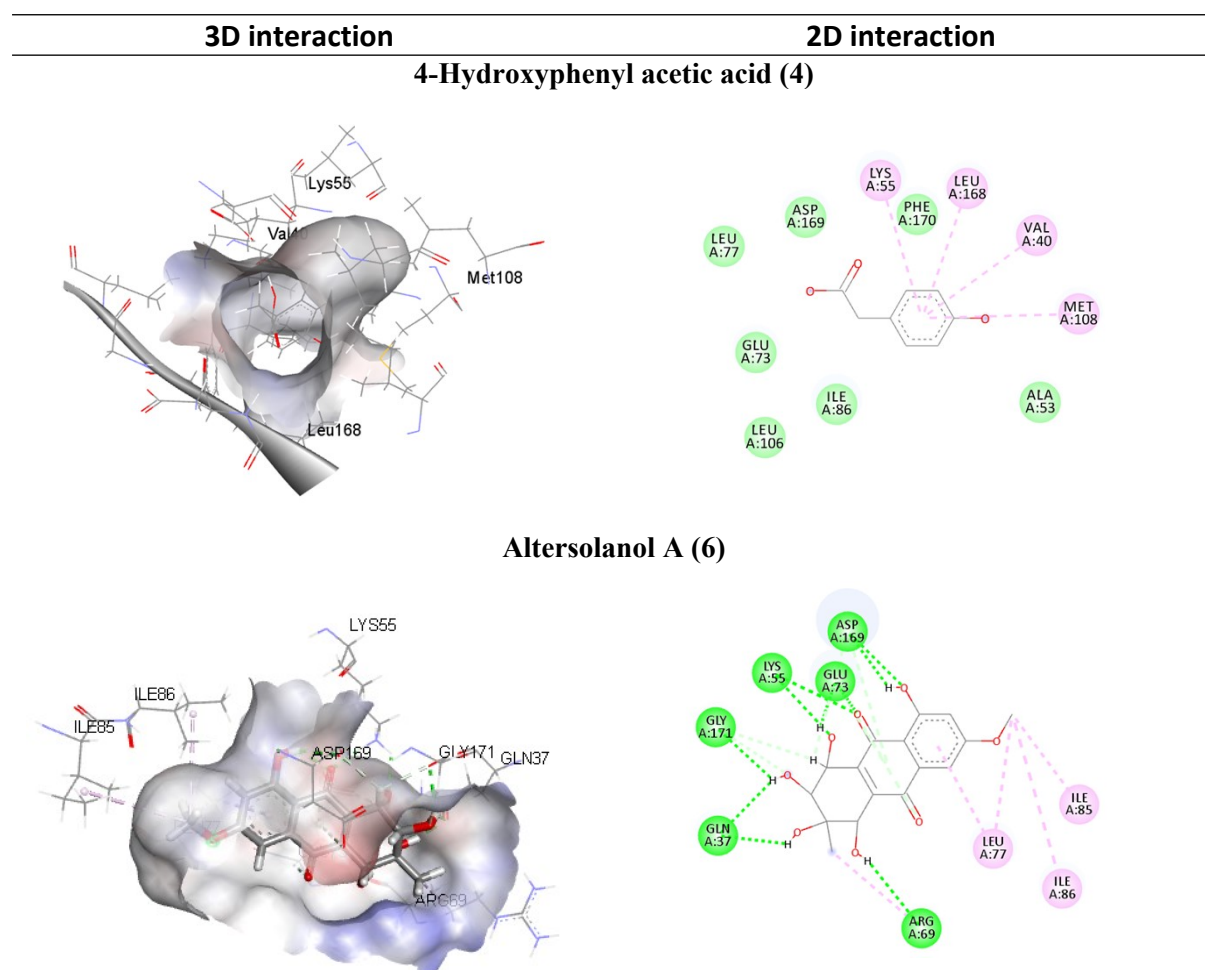

## References

- 1 Z. Xu, X. Wu, G. Li, Z. Feng and J. Xu, *Nat. Prod. Res.*, 2020, **34**, 1002–1007.
- 2 Z.-H. He, J. Wu, L. Xu, M.-Y. Hu, M.-M. Xie, Y.-J. Hao, S.-J. Li, Z.-Z. Shao and X.-W. Yang, *Mar. Drugs*, 2021, **19**, 580.
- 3 Y. Liu, W. Yang, Q. Liao and Z. She, *Chem. Biodivers.*, 2022, **19**, 1–8.
- 4 Y. Chen, W. Yang, G. Zou, S. Chen, J. Pang and Z. She, *Fitoterapia*, 2019, **139**, 104369.
- 5 M. Sugano, T. Oshima, K. Furuya, H. Kuwano, T. Hata and H. Hanzawal, *J. Am. Chem. Soc.*, 1991, **7**, 5463–5464.
- 6 M. Sugano, Y. Iijima, H. Haruyama, K. Yoda and T. Hatal, *J. Org. Chem.*, 1994, 564–569.
- 7 M. Sugano, A. Sato, Y. Iijima, K. Furuya, H. Kuwano and T. Hata, *J. Antibiot. (Tokyo)*, 1995, **48**, 1188–1190.
- 8 S. Chen, Z. Liu, H. Tan, Y. Chen, S. Li, H. Li, H. Guo, S. Zhu, H. Liu and W. Zhang, *Mar. Drugs*, 2019, **17**, 1–14.
- 9 T. Shi, J. Qi, C.-L. Shao, D.-L. Zhao, X.-M. Hou and C.-Y. Wang, *Mar. Drugs*, 2017, **15**, 1–7.
- 10 X. Xia, S. Kim, S. Bang, H. Lee, C. Liu and C. Park, *J. Antibiot. (Tokyo)*, 2015, **68**, 139–141.
- 11 Z. Hu, J. V. Gopal, L. Liu and Z. Gao, *Nat. Prod. Res.*, 2021, 1–6.
- 12 A. Maha, V. Rukachaisirikul, S. Saithong, S. Phongpaichit, W. Poonsuwan, J. Sakayaroj, P. Saparpakorn and S. Hannongbua, *Phytochemistry*, 2016, **122**, 223–229.
- 13 G. Xia, J. Li, H. Li, Y. Long, S. Lin, Y. Lu, L. He, Y. Lin, L. Liu and Z. She, *Mar. Drugs*, 2014, **12**, 2953–2969.
- 14 M. S. C. Pedras, J. L. Taylor and V. M. Morales, *Phytochemistry*.
- 15 E. Okuyama, T. H. Asegawa, T. M. Atsushita, H. F. Ujimoto and M. I. Shibashi, *Chem. Pharm. Bull.*, 2001, **49**, 154–160.
- 16 Y. Wang, W. Chen, Z. Xu, Q. Bai, X. Zhou, C. Zheng, M. Bai and G. Chen, *Mar. Drugs*, 2023, **21**, 2–13.
- 17 C. Lee, S. Kim, W. Li, S. Bang, H. Lee, H. J. Lee, E. Y. Noh, J. E. Park, W. Y. Bang and S. H. Shim, *J. Antibiot. (Tokyo)*, 2017, **70**, 737–742.
- 18 S.-S. Gao, X.-M. Li, F.-Y. Du, C.-S. Li, P. Proksch and B.-G. Wang, *Mar. Drugs*, 2011, **9**, 59–70.
- 19 S. Shen, W. Li and J. Wang, *Nat. Prod. Res.*, 2013, 37–41.
- 20 V. Abrol, M. Kushwaha, D. Arora, S. Mallubhotla and S. Jaglan, *ACS Omega*, 2021, **6**, 16266–16272.
- 21 W. Weng, R. Li, Y. Zhang, X. Pan, S. Jiang, C. Sun, C. Zhang and X. Lu, *Front. Microbiol.*, 2022, **13**, 1–9.
- 22 J. Bao, X. Y. Zhang, J. J. Dong, X. Y. Xu, X. H. Nong and S. H. Qi, *Chem. Lett.*, 2014, **43**, 837–839.

- 23 H. Y. Kim, H. M. Park and C. H. Lee, *J. Microbiol. Methods*, 2012, **90**, 327–335.
- 24 A. Aly, A. Debbab, R. Edrada-Ebel, W. Muller, M. Kubbutat, V. Wray, R. Ebel and P. Proksch, *Mycosphere*, 2010, **1**, 153–162.
- 25 M. Teiten, F. Mack, A. Debbab, A. H. Aly, M. Dicato, P. Proksch and M. Diederich, *Bioorg. Med. Chem.*, 2013, **21**, 3850–3858.
- 26 B. Liu, H. Wang, L. Zhang, F. Liu, F. He, J. Bai, H. Hua, G. Chen and Y. Pei, *Nat. Prod. Res.*, 2015, 4–9.
- 27 L. Chen, Y. X. Bi, Y. P. Li, X. X. Li, Q. Y. Liu, M. G. Ying, Q. H. Zheng, L. Du and Q. Q. Zhang, *Heterocycles*, 2017, **94**, 1766–1774.
